# Supplementary material for: Effect of temperature on the gas-phase reaction of CH3CN with OH radicals: experimental (T = 11.7–177.5 K) and computational (T = 10–400 K) kinetic study
Source: Royal Society of Chemistry journal article supplement (doi:10.1039/d3cp04944b), 2024-01-01
Supplement: d3cp04944b1.pdf [file d3cp04944b1.pdf]

## SUPPORTING INFORMATION

### Effect of temperature on the gas-phase reaction of CH<sub>3</sub>CN with OH radicals: Experimental ( $T=11.7-177.5$ K) and computational ( $T=10-400$ K) kinetic study

Daniel González,<sup>1,2</sup> André Canosa,<sup>3</sup> Emilio Martínez-Núñez,<sup>4</sup> Antonio Fernández-Ramos,<sup>4,5,\*</sup> Bernabé Ballesteros,<sup>1,2</sup> Marcelino Agúndez,<sup>6</sup> José Cernicharo<sup>6</sup> and Elena Jiménez<sup>1,2,\*</sup>

<sup>1</sup> Departamento de Química Física, Facultad de Ciencias y Tecnologías Químicas, Universidad de Castilla-La Mancha (UCLM), Avda. Camilo José Cela 1B, 13071 Ciudad Real, Spain.

<sup>2</sup> Instituto de Investigación en Combustión y Contaminación Atmosférica, UCLM, Camino de Moledores s/n, 13071 Ciudad Real, Spain.

<sup>3</sup> Institut de Physique de Rennes-CNRS – UMR 6251, Université de Rennes, F-35000 Rennes, France.

<sup>4</sup> Departamento de Química Física, Facultad de Química, Campus Vida, Universidade de Santiago de Compostela, Avda. das Ciencias s/n, 15782, Santiago de Compostela, Spain.

<sup>5</sup> Centro Singular de Investigación en Química Biológica y Materiales Moleculares (CIQUS), Campus Vida, Universidade de Santiago de Compostela, C/ Jenaro de la Fuente s/n, 15782, Santiago de Compostela, Spain.

<sup>6</sup> Molecular Astrophysics Group, Instituto de Física Fundamental (IFF-CSIC); Consejo Superior de Investigaciones Científicas, C/Serrano 123, 28006, Madrid, Spain.

\* Correspondence: [Elena.Jimenez@uclm.es](mailto:Elena.Jimenez@uclm.es); [qf.ramos@usc.es](mailto:qf.ramos@usc.es)

### ***Kinetic analysis***

As discussed in our previous works,<sup>1,2</sup> the initial increase of  $I_{LIF}$  is due to the population of the OH( $X^2\Pi, v''=0$ ) from rotational relaxation within the electronic ground state. As shown in Fig. S1.A, the timescale for which rotational relaxation is produced lies on the order of a few tens of microseconds. After the collisional relaxation is complete, the OH loss results from a typical *pseudo*-first order scenario and the temporal evolution of  $I_{LIF}$  follows a single exponential behaviour, as shown by the integrated rate equation ES1 in terms of the LIF intensities:

$$I_{LIF}(t) = I_{LIF}(t_0) \exp^{-k'(t-t_0)} \quad (\text{ES1})$$

where  $t_0$  is the reaction time from which the analysis of the decays was started.

In Figure S1.A, we present an example of the  $I_{LIF}$  vs. reaction time profiles recorded at 36.2 K in the absence of CH<sub>3</sub>CN (black circles) together with the value of  $k'_0$  derived from the regression analysis. When CH<sub>3</sub>CN is present ( $[\text{CH}_3\text{CN}]=1.46\times 10^{13} \text{ cm}^{-3}$  (red squares) and  $[\text{CH}_3\text{CN}]=1.39\times 10^{14} \text{ cm}^{-3}$  (blue triangles)) the OH-decay is faster, as shown by the values of  $k'$  derived from the regression analysis (Figure S1.B). In Figure S1, the difference  $I_{LIF,\text{exp}} - I_{LIF,\text{fit}}$  (residual) is also depicted, showing the goodness of the fit.

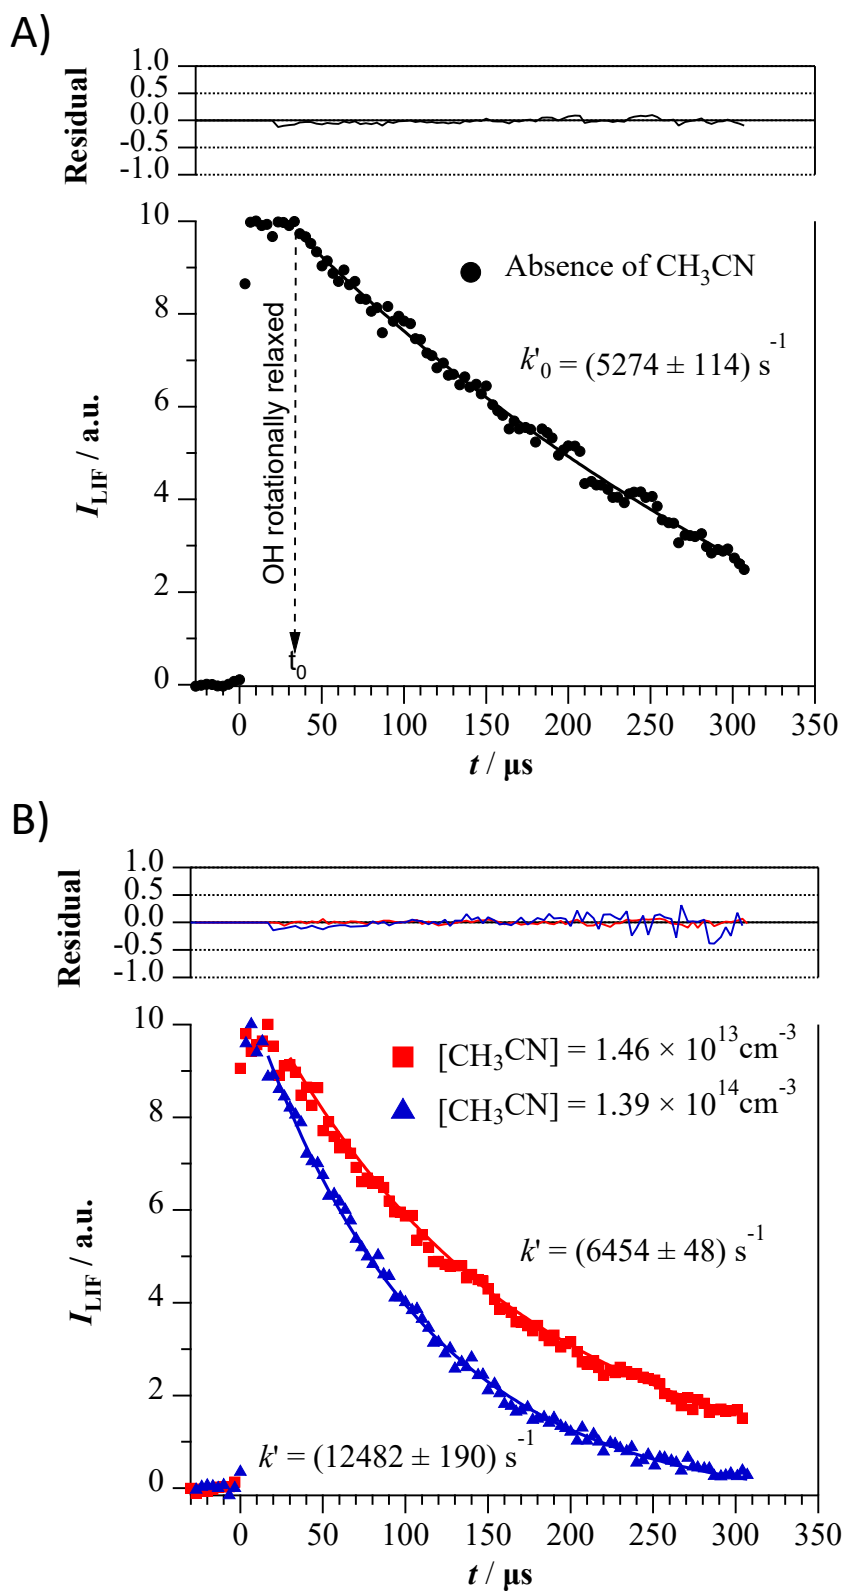

**Figure S1.** Examples of the  $I_{\text{LIF}}$  recorded as a function of the reaction time at 36.2 K A) in the absence (black circles) and B) in the presence (red squares and blue triangles) of  $\text{CH}_3\text{CN}$  together with the corresponding values of  $k'_0$  and  $k'$  derived from the regression analysis.

### ***Determination of [CH<sub>3</sub>CN] in the jet***

Gaseous CH<sub>3</sub>CN was introduced in the system from diluted gas mixtures or pure liquid samples ( $\geq 99.9\%$ , Sigma-Aldrich).

#### *Method 1: Flow rate measurements*

Diluted mixtures of CH<sub>3</sub>CN in Ar, N<sub>2</sub>, or He were prepared in a 20-L or 50-L storage bulb by introducing a controlled partial pressure of pure CH<sub>3</sub>CN. The dilution factor ( $f$ ) of these mixtures ranged from 0.4% to 5.5%. [CH<sub>3</sub>CN] was calculated from the mass flow rate of the CH<sub>3</sub>CN/buffer gas mixture, considering the mixing ratio  $f$ , the total gas jet density and the total mass flow through the system, as explained for other reactants.<sup>3-5</sup> All gases were introduced through a calibrated mass flow controller (Sierra Instruments, Inc., model: SmartTrak 100).

#### *Method 2: Vapor pressure measurements*

In some experiments carried out at 36.2 K, pure CH<sub>3</sub>CN was introduced into the *reservoir* by bubbling a small flow of helium ( $F_{He/CH_3CN}$ ) through the liquid acetonitrile contained in a glass bubbler similar to that described in Sleiman *et al.*<sup>6</sup> This bubbler was immersed in a water bath at a constant temperature (22.3° C). The temperature of the water was accurately measured with a CRISON portable thermometer. In these experiments, [CH<sub>3</sub>CN] was calculated from the partial flow rate of pure CH<sub>3</sub>CN,  $F_{CH_3CN}$ , introduced in the *reservoir*, which was determined from the measured total pressure in the bubbler ( $P_T$ ) and the vapor pressure of CH<sub>3</sub>CN,  $P_{v,CH_3CN}$ , at that temperature according to equation ES2.  $P_T$  (175-180 mbar) was precisely measured over the bubbler with a 1000-Torr full scale capacitance manometer (Leybold Oerlikon, CERAVAC). As room temperature in the laboratory was slightly higher than that of the water bath, the condensation of gaseous CH<sub>3</sub>CN in the Teflon tubes from the bubbler to the reservoir is unlikely to occur.

$$F_{CH_3CN} = P_{v,CH_3CN} \times \frac{F_{buffer/CH_3CN}}{P_T - P_{v,CH_3CN}} \quad (ES2)$$

$P_{v,CH_3CN}$  (103.96 mbar at 22.3 °C) was calculated using Antoine's law obtained by Dojcansky and Heinrich.<sup>7</sup> For this method, [CH<sub>3</sub>CN] in the jet was calculated considering the proportion of CH<sub>3</sub>CN in the total mass flow and the gas density.

$$[CH_3CN] = n \times \frac{F_{CH_3CN}}{F_{Total}} \quad (ES3)$$

In separate experiments carried out at 36.2 K, a diluted mixture (method 1), prepared as described above, was used as well to compare both methods. As it can be seen in Figure S2, both procedures provide similar [CH<sub>3</sub>CN] and, therefore, similar  $k'$  values.

As we confirmed that [CH<sub>3</sub>CN] from flow measurements (ES2) is well-determined, for the rest of the experiments we used the method 1 using diluted mixtures of acetonitrile.

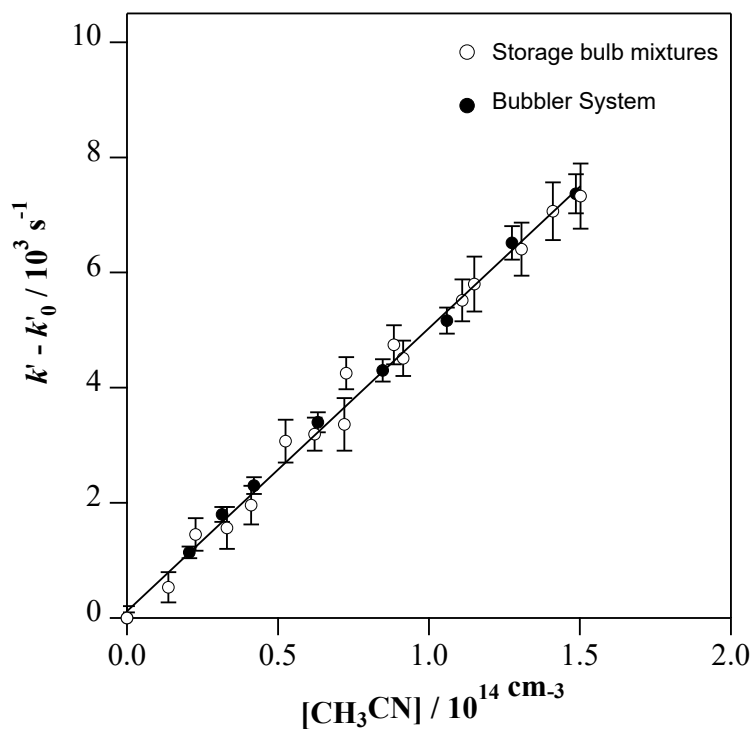

**Figure S2.** Example of  $k' - k'_0$  versus  $[\text{CH}_3\text{CN}]$  plot using the two different methods described to obtain  $[\text{CH}_3\text{CN}]$  in the jet at 36.2 K.

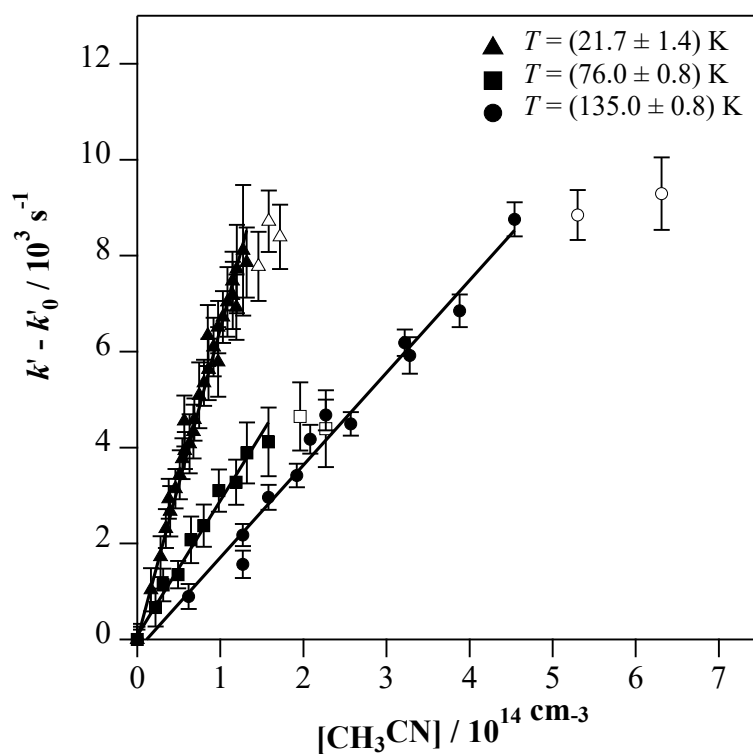

**Figure S3.** Example of the downward curvature observed at 21.7, 76.0, and 135.0 K. Empty symbols denote the acetonitrile concentrations for which dimerization starts affecting the kinetic results.

## REFERENCES

- 1 E. Jiménez, B. Ballesteros, A. Canosa, T. M. Townsend, F. J. Maigler, V. Napal, B. R. Rowe and J. Albaladejo, *Rev. Sci. Instrum.*, 2015, **86**, 45108.
- 2 A. J. Ocaña, S. Blázquez, B. Ballesteros, A. Canosa, M. Antiñolo, J. Albaladejo and E. Jiménez, *Phys. Chem. Chem. Phys.*, 2018, **20**, 5865–5873.
- 3 S. Blázquez, D. González, A. García-Sáez, M. Antiñolo, A. Bergeat, F. Caralp, R. Mereau, A. Canosa, B. Ballesteros, J. Albaladejo and E. Jiménez, *ACS Earth Sp. Chem.*, 2019, **3**, 1873–1883.
- 4 S. Blázquez, D. González, E. M. Neeman, B. Ballesteros, M. Agúndez, A. Canosa, J. Albaladejo, J. Cernicharo and E. Jiménez, *Phys. Chem. Chem. Phys.*, 2020, **22**, 20562–20572.
- 5 D. González, A. Lema-Saavedra, S. Espinosa, E. Martínez-Núñez, A. Fernández-Ramos, A. Canosa, B. Ballesteros and E. Jiménez, *Phys. Chem. Chem. Phys.*, 2022, **24**, 23593–23601.
- 6 C. Sleiman, S. González, S. J. Klippenstein, D. Talbi, G. El Dib and A. Canosa, *Phys. Chem. Chem. Phys.*, 2016, **18**, 15118–15132.
- 7 J. Dojcansky and J. Heinrich, *Chem. Zvesti*, 1974, **28**, 157–159.

# Electronic structure data: M08-HX/MG3S

## CH<sub>3</sub>CN information

-----  
Analysis of STRUC: CH3CN  
-----

Number of conformers: 1

V0 = electronic energy  
V1 = electronic energy + zero-point energy (ZPE)

ZPE is calculated using scaled frequencies  
Frequency scale factor: 0.97300

min(V0) = -132.75766660 hartree  
min(V1) = -132.71334082 hartree

Relative energies (in kcal/mol):

| name | V0-min(V0) | V1-min(V1) | ZPE   | mass (amu) | weight | PGS |
|------|------------|------------|-------|------------|--------|-----|
| 001  | 0.000      | 0.000      | 27.81 | 41.03      | 1      | C3v |

weight: equals 2 if the structure has a conformational enantiomer,  
equals 1 otherwise

PGS : point group of symmetry

-----  
Conformation: 001  
-----

| Molecular formula : C(2)H(3)N  
| Number of atoms : 6  
| Number of electrons : 22  
| Vibrational DOFs : 12  
| Charge : 0  
| Multiplicity : 1  
| Electronic energy (V0): -132.75766660 hartree  
| Total mass [root] : 41.0265 amu  
| Total mass : 41.0265 amu  
| Point group symmetry : C3v  
| Rotational sym num : 3  
| Cartesian coordinates (Angstrom):  
| N +0.00000000 +0.00000000 -1.31409210 [ 14.003 amu]  
| C +0.00000000 +0.00000000 -0.17054440 [ 12.000 amu]  
| C +0.00000000 +0.00000000 +1.28604781 [ 12.000 amu]  
| H -0.04402010 +1.02475150 +1.65878098 [ 1.008 amu]  
| H -0.86545079 -0.55049827 +1.65878098 [ 1.008 amu]  
| H +0.90947088 -0.47425323 +1.65878098 [ 1.008 amu]  
| Moments and product of inertia (au):  
| +2.071E+04 +3.534E+05 +3.534E+05 [ 2.586E+15]  
| Vibrational frequencies [1/cm] (scaled by 0.973):  
| 378.89 378.90 918.94 1029.81 1029.82 1363.50  
| 1428.17 1428.17 2374.39 2987.89 3069.14 3069.14  
| Vibrational zero-point energies [kcal/mol]:  
| 0.54 0.54 1.31 1.47 1.47 1.95  
| 2.04 2.04 3.39 4.27 4.39 4.39  
| Vibrational zero-point energy: +0.04432578 hartree =  
| +27.81 kcal/mol =  
| +1.21 eV =  
| +9728.38 cm<sup>-1</sup>  
| V0 + zero-point energy (V1) : -132.71334082 hartree  
|

Partition functions (pfns):

| T (K)  | Qtr (au)  | Qtr (cm <sup>-3</sup> ) | Qrot      | Qvib [V0]  | Qvib [V1] | Qel       |
|--------|-----------|-------------------------|-----------|------------|-----------|-----------|
| 10.00  | 2.314E-01 | 1.562E+24               | 1.514E+01 | 1.318E-608 | 1.000E+00 | 1.000E+00 |
| 20.00  | 6.546E-01 | 4.417E+24               | 4.283E+01 | 1.148E-304 | 1.000E+00 | 1.000E+00 |
| 30.00  | 1.202E+00 | 8.115E+24               | 7.869E+01 | 2.362E-203 | 1.000E+00 | 1.000E+00 |
| 40.00  | 1.851E+00 | 1.249E+25               | 1.212E+02 | 1.071E-152 | 1.000E+00 | 1.000E+00 |
| 50.00  | 2.587E+00 | 1.746E+25               | 1.693E+02 | 2.654E-122 | 1.000E+00 | 1.000E+00 |
| 60.00  | 3.401E+00 | 2.295E+25               | 2.226E+02 | 4.861E-102 | 1.000E+00 | 1.000E+00 |
| 70.00  | 4.286E+00 | 2.892E+25               | 2.805E+02 | 1.447E-87  | 1.001E+00 | 1.000E+00 |
| 80.00  | 5.236E+00 | 3.534E+25               | 3.427E+02 | 1.037E-76  | 1.002E+00 | 1.000E+00 |
| 90.00  | 6.248E+00 | 4.217E+25               | 4.089E+02 | 2.883E-68  | 1.005E+00 | 1.000E+00 |
| 100.00 | 7.318E+00 | 4.939E+25               | 4.789E+02 | 1.643E-61  | 1.009E+00 | 1.000E+00 |
| 110.00 | 8.443E+00 | 5.698E+25               | 5.525E+02 | 5.550E-56  | 1.014E+00 | 1.000E+00 |
| 120.00 | 9.620E+00 | 6.492E+25               | 6.295E+02 | 2.252E-51  | 1.022E+00 | 1.000E+00 |
| 130.00 | 1.085E+01 | 7.320E+25               | 7.098E+02 | 1.792E-47  | 1.031E+00 | 1.000E+00 |
| 140.00 | 1.212E+01 | 8.181E+25               | 7.933E+02 | 3.962E-44  | 1.042E+00 | 1.000E+00 |
| 150.00 | 1.344E+01 | 9.073E+25               | 8.798E+02 | 3.148E-41  | 1.055E+00 | 1.000E+00 |
| 160.00 | 1.481E+01 | 9.995E+25               | 9.692E+02 | 1.089E-38  | 1.070E+00 | 1.000E+00 |
| 170.00 | 1.622E+01 | 1.095E+26               | 1.061E+03 | 1.899E-36  | 1.087E+00 | 1.000E+00 |
| 180.00 | 1.767E+01 | 1.193E+26               | 1.156E+03 | 1.873E-34  | 1.106E+00 | 1.000E+00 |
| 190.00 | 1.917E+01 | 1.293E+26               | 1.254E+03 | 1.142E-32  | 1.126E+00 | 1.000E+00 |
| 200.00 | 2.070E+01 | 1.397E+26               | 1.355E+03 | 4.634E-31  | 1.148E+00 | 1.000E+00 |
| 210.00 | 2.227E+01 | 1.503E+26               | 1.457E+03 | 1.325E-29  | 1.172E+00 | 1.000E+00 |
| 220.00 | 2.388E+01 | 1.612E+26               | 1.563E+03 | 2.802E-28  | 1.198E+00 | 1.000E+00 |
| 230.00 | 2.553E+01 | 1.723E+26               | 1.670E+03 | 4.556E-27  | 1.225E+00 | 1.000E+00 |
| 240.00 | 2.721E+01 | 1.836E+26               | 1.781E+03 | 5.890E-26  | 1.254E+00 | 1.000E+00 |
| 250.00 | 2.893E+01 | 1.952E+26               | 1.893E+03 | 6.221E-25  | 1.285E+00 | 1.000E+00 |
| 260.00 | 3.068E+01 | 2.070E+26               | 2.008E+03 | 5.496E-24  | 1.318E+00 | 1.000E+00 |
| 270.00 | 3.247E+01 | 2.191E+26               | 2.125E+03 | 4.142E-23  | 1.353E+00 | 1.000E+00 |
| 280.00 | 3.429E+01 | 2.314E+26               | 2.244E+03 | 2.710E-22  | 1.390E+00 | 1.000E+00 |
| 300.00 | 3.803E+01 | 2.566E+26               | 2.488E+03 | 8.025E-21  | 1.469E+00 | 1.000E+00 |
| 320.00 | 4.189E+01 | 2.827E+26               | 2.741E+03 | 1.571E-19  | 1.558E+00 | 1.000E+00 |
| 340.00 | 4.588E+01 | 3.096E+26               | 3.002E+03 | 2.187E-18  | 1.655E+00 | 1.000E+00 |
| 360.00 | 4.999E+01 | 3.373E+26               | 3.271E+03 | 2.293E-17  | 1.762E+00 | 1.000E+00 |
| 400.00 | 5.855E+01 | 3.951E+26               | 3.831E+03 | 1.277E-15  | 2.010E+00 | 1.000E+00 |

Qtr : translational pfn per volume unit

Qrot: rotational pfn (rigid-rotor); includes rotational symmetry number

Qvib: vibrational pfn (harmonic-oscillator) relative to V0 and to V1

Qel : electronic pfn

| T (K)  | Qtot [V0]  | Qtot [V1] | Qtot [V0]  | Qtot [V1] |
|--------|------------|-----------|------------|-----------|
| 10.00  | 4.618E-608 | 3.505E+00 | 3.116E-583 | 2.365E+25 |
| 20.00  | 3.218E-303 | 2.804E+01 | 2.172E-278 | 1.892E+26 |
| 30.00  | 2.235E-201 | 9.462E+01 | 1.508E-176 | 6.386E+26 |
| 40.00  | 2.403E-150 | 2.243E+02 | 1.622E-125 | 1.514E+27 |
| 50.00  | 1.163E-119 | 4.381E+02 | 7.847E-95  | 2.956E+27 |
| 60.00  | 3.680E-99  | 7.572E+02 | 2.483E-74  | 5.110E+27 |
| 70.00  | 1.739E-84  | 1.203E+03 | 1.173E-59  | 8.119E+27 |
| 80.00  | 1.861E-73  | 1.798E+03 | 1.256E-48  | 1.214E+28 |
| 90.00  | 7.365E-65  | 2.567E+03 | 4.970E-40  | 1.732E+28 |
| 100.00 | 5.759E-58  | 3.535E+03 | 3.886E-33  | 2.385E+28 |
| 110.00 | 2.589E-52  | 4.731E+03 | 1.747E-27  | 3.193E+28 |
| 120.00 | 1.364E-47  | 6.187E+03 | 9.204E-23  | 4.175E+28 |
| 130.00 | 1.379E-43  | 7.938E+03 | 9.309E-19  | 5.357E+28 |
| 140.00 | 3.810E-40  | 1.002E+04 | 2.571E-15  | 6.763E+28 |
| 150.00 | 3.723E-37  | 1.248E+04 | 2.513E-12  | 8.423E+28 |
| 160.00 | 1.563E-34  | 1.536E+04 | 1.055E-09  | 1.037E+29 |
| 170.00 | 3.270E-32  | 1.872E+04 | 2.207E-07  | 1.263E+29 |
| 180.00 | 3.828E-30  | 2.260E+04 | 2.583E-05  | 1.525E+29 |



|        |           |           |           |           |
|--------|-----------|-----------|-----------|-----------|
| 190.00 | 2.746E-28 | 2.707E+04 | 1.853E-03 | 1.827E+29 |
| 200.00 | 1.299E-26 | 3.219E+04 | 8.768E-02 | 2.172E+29 |
| 210.00 | 4.301E-25 | 3.804E+04 | 2.902E+00 | 2.567E+29 |
| 220.00 | 1.046E-23 | 4.470E+04 | 7.056E+01 | 3.016E+29 |
| 230.00 | 1.943E-22 | 5.224E+04 | 1.311E+03 | 3.525E+29 |
| 240.00 | 2.853E-21 | 6.077E+04 | 1.926E+04 | 4.101E+29 |
| 250.00 | 3.406E-20 | 7.039E+04 | 2.299E+05 | 4.750E+29 |
| 260.00 | 3.385E-19 | 8.120E+04 | 2.284E+06 | 5.480E+29 |
| 270.00 | 2.857E-18 | 9.334E+04 | 1.928E+07 | 6.299E+29 |
| 280.00 | 2.085E-17 | 1.069E+05 | 1.407E+08 | 7.216E+29 |
| 300.00 | 7.594E-16 | 1.390E+05 | 5.125E+09 | 9.383E+29 |
| 320.00 | 1.804E-14 | 1.789E+05 | 1.217E+11 | 1.207E+30 |
| 340.00 | 3.013E-13 | 2.279E+05 | 2.033E+12 | 1.538E+30 |
| 360.00 | 3.750E-12 | 2.881E+05 | 2.531E+13 | 1.944E+30 |
| 400.00 | 2.864E-10 | 4.507E+05 | 1.932E+15 | 3.042E+30 |

-----  
in au | in cm<sup>-3</sup>  
-----

Qtot: total pfn per unit volume

\* [V0] --> from the bottom of the potential (V0)

\* [V1] --> from the zero-point energy (V1)

\* includes rotational symmetry number

Gibbs free energy (hartree):

| T (K)  | v = 1 cm <sup>3</sup> | v = kbT/p0    |
|--------|-----------------------|---------------|
| 10.00  | -132.71519105         | -132.71366997 |
| 20.00  | -132.71717298         | -132.71417473 |
| 30.00  | -132.71920462         | -132.71474576 |
| 40.00  | -132.72126854         | -132.71535984 |
| 50.00  | -132.72335647         | -132.71600593 |
| 60.00  | -132.72546357         | -132.71667756 |
| 70.00  | -132.72758667         | -132.71737050 |
| 80.00  | -132.72972363         | -132.71808184 |
| 90.00  | -132.73187290         | -132.71880945 |
| 100.00 | -132.73403335         | -132.71955178 |
| 110.00 | -132.73620414         | -132.72030761 |
| 120.00 | -132.73838459         | -132.72107598 |
| 130.00 | -132.74057415         | -132.72185612 |
| 140.00 | -132.74277238         | -132.72264735 |
| 150.00 | -132.74497889         | -132.72344913 |
| 160.00 | -132.74719333         | -132.72426096 |
| 170.00 | -132.74941541         | -132.72508240 |
| 180.00 | -132.75164487         | -132.72591309 |
| 190.00 | -132.75388146         | -132.72675267 |
| 200.00 | -132.75612498         | -132.72760085 |
| 210.00 | -132.75837524         | -132.72845734 |
| 220.00 | -132.76063206         | -132.72932191 |
| 230.00 | -132.76289529         | -132.73019433 |
| 240.00 | -132.76516478         | -132.73107439 |
| 250.00 | -132.76744042         | -132.73196192 |
| 260.00 | -132.76972209         | -132.73285673 |
| 270.00 | -132.77200967         | -132.73375869 |
| 280.00 | -132.77430309         | -132.73466765 |
| 300.00 | -132.77890706         | -132.73650607 |
| 320.00 | -132.78353337         | -132.73837105 |
| 340.00 | -132.78818150         | -132.74026181 |
| 360.00 | -132.79285097         | -132.74217763 |
| 400.00 | -132.80225230         | -132.74608205 |

-----  
v : volume per molecule

p0: 1bar

## OH information

-----  
 Analysis of STRUC: OH  
 -----

Number of conformers: 1

V0 = electronic energy  
 V1 = electronic energy + zero-point energy (ZPE)

ZPE is calculated using scaled frequencies  
 Frequency scale factor: 0.97300

min(V0) = -75.72715520 hartree  
 min(V1) = -75.71873895 hartree

Relative energies (in kcal/mol):

| name | V0-min(V0) | V1-min(V1) | ZPE  | mass (amu) | weight | PGS   |
|------|------------|------------|------|------------|--------|-------|
| 001  | 0.000      | 0.000      | 5.28 | 17.00      | 1      | C1hfv |

weight: equals 2 if the structure has a conformational enantiomer,  
 equals 1 otherwise

PGS : point group of symmetry

-----  
 Conformation: 001  
 -----

| Molecular formula : HO  
 | Number of atoms : 2  
 | Number of electrons : 9  
 | Vibrational DOFs : 1  
 | Charge : 0  
 | Multiplicity : 2  
 | Electronic energy (V0): -75.72715520 hartree  
 | Total mass [root] : 17.0027 amu  
 | Total mass : 17.0027 amu  
 | Point group symmetry : C1hfv  
 | Rotational sym num : 1  
 | Cartesian coordinates (Angstrom):  
 | O -0.05750407 +0.00000000 +0.00000000 [ 15.995 amu]  
 | H +0.91263116 +0.00000000 +0.00000000 [ 1.008 amu]  
 | Moments and product of inertia (au):  
 | +5.809E+03  
 | Vibrational frequencies [1/cm] (scaled by 0.973):  
 | 3694.31  
 | Vibrational zero-point energies [kcal/mol]:  
 | 5.28  
 | Vibrational zero-point energy: +0.00841625 hartree =  
 | +5.28 kcal/mol =  
 | +0.23 eV =  
 | +1847.15 cm<sup>-1</sup>  
 | V0 + zero-point energy (V1) : -75.71873895 hartree

| Partition functions (pfns):

| T (K) | Qtr (au)  | Qtr (cm <sup>-3</sup> ) | Qrot      | Qvib [V0]  | Qvib [V1] | Qel       |
|-------|-----------|-------------------------|-----------|------------|-----------|-----------|
| 10.00 | 6.174E-02 | 4.167E+23               | 3.679E-01 | 3.804E-116 | 1.000E+00 | 2.000E+00 |
| 20.00 | 1.746E-01 | 1.178E+24               | 7.358E-01 | 1.950E-58  | 1.000E+00 | 2.000E+00 |
| 30.00 | 3.208E-01 | 2.165E+24               | 1.104E+00 | 3.363E-39  | 1.000E+00 | 2.002E+00 |
| 40.00 | 4.939E-01 | 3.333E+24               | 1.472E+00 | 1.397E-29  | 1.000E+00 | 2.013E+00 |

|        |           |           |           |           |           |           |
|--------|-----------|-----------|-----------|-----------|-----------|-----------|
| 50.00  | 6.903E-01 | 4.658E+24 | 1.839E+00 | 8.242E-24 | 1.000E+00 | 2.036E+00 |
| 60.00  | 9.074E-01 | 6.124E+24 | 2.207E+00 | 5.799E-20 | 1.000E+00 | 2.070E+00 |
| 70.00  | 1.143E+00 | 7.717E+24 | 2.575E+00 | 3.247E-17 | 1.000E+00 | 2.113E+00 |
| 80.00  | 1.397E+00 | 9.428E+24 | 2.943E+00 | 3.737E-15 | 1.000E+00 | 2.161E+00 |
| 90.00  | 1.667E+00 | 1.125E+25 | 3.311E+00 | 1.498E-13 | 1.000E+00 | 2.213E+00 |
| 100.00 | 1.952E+00 | 1.318E+25 | 3.679E+00 | 2.871E-12 | 1.000E+00 | 2.267E+00 |
| 110.00 | 2.253E+00 | 1.520E+25 | 4.047E+00 | 3.216E-11 | 1.000E+00 | 2.320E+00 |
| 120.00 | 2.567E+00 | 1.732E+25 | 4.415E+00 | 2.408E-10 | 1.000E+00 | 2.373E+00 |
| 130.00 | 2.894E+00 | 1.953E+25 | 4.783E+00 | 1.323E-09 | 1.000E+00 | 2.425E+00 |
| 140.00 | 3.234E+00 | 2.183E+25 | 5.151E+00 | 5.698E-09 | 1.000E+00 | 2.474E+00 |
| 150.00 | 3.587E+00 | 2.421E+25 | 5.518E+00 | 2.020E-08 | 1.000E+00 | 2.522E+00 |
| 160.00 | 3.952E+00 | 2.667E+25 | 5.886E+00 | 6.113E-08 | 1.000E+00 | 2.568E+00 |
| 170.00 | 4.328E+00 | 2.920E+25 | 6.254E+00 | 1.624E-07 | 1.000E+00 | 2.612E+00 |
| 180.00 | 4.715E+00 | 3.182E+25 | 6.622E+00 | 3.871E-07 | 1.000E+00 | 2.653E+00 |
| 190.00 | 5.113E+00 | 3.451E+25 | 6.990E+00 | 8.419E-07 | 1.000E+00 | 2.693E+00 |
| 200.00 | 5.522E+00 | 3.727E+25 | 7.358E+00 | 1.694E-06 | 1.000E+00 | 2.731E+00 |
| 210.00 | 5.942E+00 | 4.010E+25 | 7.726E+00 | 3.190E-06 | 1.000E+00 | 2.766E+00 |
| 220.00 | 6.371E+00 | 4.299E+25 | 8.094E+00 | 5.671E-06 | 1.000E+00 | 2.801E+00 |
| 230.00 | 6.810E+00 | 4.596E+25 | 8.462E+00 | 9.588E-06 | 1.000E+00 | 2.833E+00 |
| 240.00 | 7.259E+00 | 4.899E+25 | 8.829E+00 | 1.552E-05 | 1.000E+00 | 2.864E+00 |
| 250.00 | 7.718E+00 | 5.208E+25 | 9.197E+00 | 2.417E-05 | 1.000E+00 | 2.894E+00 |
| 260.00 | 8.185E+00 | 5.524E+25 | 9.565E+00 | 3.637E-05 | 1.000E+00 | 2.922E+00 |
| 270.00 | 8.662E+00 | 5.846E+25 | 9.933E+00 | 5.311E-05 | 1.000E+00 | 2.948E+00 |
| 280.00 | 9.148E+00 | 6.173E+25 | 1.030E+01 | 7.549E-05 | 1.000E+00 | 2.974E+00 |
| 300.00 | 1.015E+01 | 6.846E+25 | 1.104E+01 | 1.421E-04 | 1.000E+00 | 3.022E+00 |
| 320.00 | 1.118E+01 | 7.542E+25 | 1.177E+01 | 2.472E-04 | 1.000E+00 | 3.066E+00 |
| 340.00 | 1.224E+01 | 8.260E+25 | 1.251E+01 | 4.030E-04 | 1.000E+00 | 3.106E+00 |
| 360.00 | 1.334E+01 | 9.000E+25 | 1.324E+01 | 6.221E-04 | 1.000E+00 | 3.143E+00 |
| 400.00 | 1.562E+01 | 1.054E+26 | 1.472E+01 | 1.302E-03 | 1.000E+00 | 3.209E+00 |

-----

Qtr : translational pfn per volume unit

Qrot: rotational pfn (rigid-rotor); includes rotational symmetry number

Qvib: vibrational pfn (harmonic-oscillator) relative to V0 and to V1

Qel : electronic pfn

| T (K)  | Qtot [V0]  | Qtot [V1] | Qtot [V0] | Qtot [V1] |
|--------|------------|-----------|-----------|-----------|
| 10.00  | 1.728E-117 | 4.543E-02 | 1.166E-92 | 3.066E+23 |
| 20.00  | 5.012E-59  | 2.570E-01 | 3.382E-34 | 1.734E+24 |
| 30.00  | 2.384E-39  | 7.090E-01 | 1.609E-14 | 4.785E+24 |
| 40.00  | 2.043E-29  | 1.463E+00 | 1.379E-04 | 9.874E+24 |
| 50.00  | 2.130E-23  | 2.585E+00 | 1.438E+02 | 1.744E+25 |
| 60.00  | 2.404E-19  | 4.146E+00 | 1.622E+06 | 2.798E+25 |
| 70.00  | 2.020E-16  | 6.221E+00 | 1.363E+09 | 4.198E+25 |
| 80.00  | 3.321E-14  | 8.887E+00 | 2.241E+11 | 5.997E+25 |
| 90.00  | 1.830E-12  | 1.222E+01 | 1.235E+13 | 8.244E+25 |
| 100.00 | 4.675E-11  | 1.628E+01 | 3.155E+14 | 1.099E+26 |
| 110.00 | 6.802E-10  | 2.115E+01 | 4.590E+15 | 1.427E+26 |
| 120.00 | 6.476E-09  | 2.689E+01 | 4.370E+16 | 1.815E+26 |
| 130.00 | 4.440E-08  | 3.356E+01 | 2.996E+17 | 2.265E+26 |
| 140.00 | 2.349E-07  | 4.122E+01 | 1.585E+18 | 2.782E+26 |
| 150.00 | 1.008E-06  | 4.992E+01 | 6.805E+18 | 3.369E+26 |
| 160.00 | 3.651E-06  | 5.973E+01 | 2.464E+19 | 4.031E+26 |
| 170.00 | 1.148E-05  | 7.069E+01 | 7.747E+19 | 4.770E+26 |
| 180.00 | 3.207E-05  | 8.284E+01 | 2.164E+20 | 5.590E+26 |
| 190.00 | 8.103E-05  | 9.625E+01 | 5.468E+20 | 6.495E+26 |
| 200.00 | 1.880E-04  | 1.109E+02 | 1.269E+21 | 7.487E+26 |
| 210.00 | 4.051E-04  | 1.270E+02 | 2.734E+21 | 8.570E+26 |
| 220.00 | 8.189E-04  | 1.444E+02 | 5.526E+21 | 9.746E+26 |
| 230.00 | 1.565E-03  | 1.633E+02 | 1.056E+22 | 1.102E+27 |
| 240.00 | 2.849E-03  | 1.836E+02 | 1.922E+22 | 1.239E+27 |
| 250.00 | 4.964E-03  | 2.054E+02 | 3.350E+22 | 1.386E+27 |
| 260.00 | 8.320E-03  | 2.288E+02 | 5.615E+22 | 1.544E+27 |

|        |           |           |           |           |
|--------|-----------|-----------|-----------|-----------|
| 270.00 | 1.347E-02 | 2.537E+02 | 9.093E+22 | 1.712E+27 |
| 280.00 | 2.116E-02 | 2.803E+02 | 1.428E+23 | 1.891E+27 |
| 300.00 | 4.809E-02 | 3.384E+02 | 3.245E+23 | 2.283E+27 |
| 320.00 | 9.974E-02 | 4.034E+02 | 6.730E+23 | 2.722E+27 |
| 340.00 | 1.916E-01 | 4.756E+02 | 1.293E+24 | 3.209E+27 |
| 360.00 | 3.454E-01 | 5.551E+02 | 2.331E+24 | 3.746E+27 |
| 400.00 | 9.601E-01 | 7.375E+02 | 6.479E+24 | 4.977E+27 |

---

|  | in au | in cm <sup>-3</sup> |
|--|-------|---------------------|
|--|-------|---------------------|

---

Qtot: total pfn per unit volume  
 \* [V0] --> from the bottom of the potential (V0)  
 \* [V1] --> from the zero-point energy (V1)  
 \* includes rotational symmetry number

Gibbs free energy (hartree):

---

| T (K)  | v = 1 cm <sup>3</sup> | v = kbT/p0   |
|--------|-----------------------|--------------|
| 10.00  | -75.72045155          | -75.71893048 |
| 20.00  | -75.72227392          | -75.71927566 |
| 30.00  | -75.72413781          | -75.71967896 |
| 40.00  | -75.72602920          | -75.72012051 |
| 50.00  | -75.72794187          | -75.72059133 |
| 60.00  | -75.72987221          | -75.72108621 |
| 70.00  | -75.73181773          | -75.72160156 |
| 80.00  | -75.73377648          | -75.72213469 |
| 90.00  | -75.73574688          | -75.72268343 |
| 100.00 | -75.73772763          | -75.72324605 |
| 110.00 | -75.73971764          | -75.72382111 |
| 120.00 | -75.74171601          | -75.72440741 |
| 130.00 | -75.74372198          | -75.72500394 |
| 140.00 | -75.74573489          | -75.72560986 |
| 150.00 | -75.74775418          | -75.72622443 |
| 160.00 | -75.74977939          | -75.72684702 |
| 170.00 | -75.75181008          | -75.72747708 |
| 180.00 | -75.75384591          | -75.72811413 |
| 190.00 | -75.75588655          | -75.72875776 |
| 200.00 | -75.75793171          | -75.72940758 |
| 210.00 | -75.75998115          | -75.73006326 |
| 220.00 | -75.76203464          | -75.73072450 |
| 230.00 | -75.76409198          | -75.73139102 |
| 240.00 | -75.76615298          | -75.73206259 |
| 250.00 | -75.76821747          | -75.73273897 |
| 260.00 | -75.77028531          | -75.73341996 |
| 270.00 | -75.77235635          | -75.73410537 |
| 280.00 | -75.77443047          | -75.73479503 |
| 300.00 | -75.77858746          | -75.73618647 |
| 320.00 | -75.78275545          | -75.73759313 |
| 340.00 | -75.78693370          | -75.73901401 |
| 360.00 | -75.79112157          | -75.74044823 |
| 400.00 | -75.79952398          | -75.74335373 |

---

v : volume per molecule  
 p0: 1bar

## Pre-reactive complex information

-----  
Analysis of STRUC: CPLX  
-----

Number of conformers: 1

V0 = electronic energy  
V1 = electronic energy + zero-point energy (ZPE)

ZPE is calculated using scaled frequencies  
Frequency scale factor: 0.97300

min(V0) = -208.49102788 hartree  
min(V1) = -208.43672518 hartree

Relative energies (in kcal/mol):

| name | V0-min(V0) | V1-min(V1) | ZPE   | mass (amu) | weight | PGS |
|------|------------|------------|-------|------------|--------|-----|
| 001  | 0.000      | 0.000      | 34.08 | 58.03      | 1      | C1  |

weight: equals 2 if the structure has a conformational enantiomer,  
equals 1 otherwise

PGS : point group of symmetry

-----  
Conformation: 001  
-----

| Molecular formula : C(2)H(4)NO  
| Number of atoms : 8  
| Number of electrons : 31  
| Vibrational DOFs : 18  
| Charge : 0  
| Multiplicity : 2  
| Electronic energy (V0): -208.49102788 hartree  
| Total mass [root] : 58.0293 amu  
| Total mass : 58.0293 amu  
| Point group symmetry : C1  
| Rotational sym num : 1  
| Cartesian coordinates (Angstrom):  
| N +0.35085956 -0.71184246 -1.22480033 [ 14.003 amu]  
| C +0.47391305 -0.62854964 -0.08955590 [ 12.000 amu]  
| C +0.61315739 -0.49976156 +1.35414996 [ 12.000 amu]  
| H +0.98446988 +0.49826613 +1.59351144 [ 1.008 amu]  
| H -0.36248218 -0.63142916 +1.82525524 [ 1.008 amu]  
| H +1.30763428 -1.25063531 +1.73401219 [ 1.008 amu]  
| O -1.17037030 +1.47575688 -0.13275420 [ 15.995 amu]  
| H -1.17352703 +1.28766629 -1.08537870 [ 1.008 amu]  
| Moments and product of inertia (au):  
| +3.512E+05 +5.844E+05 +9.150E+05 [ 1.878E+17]  
| Vibrational frequencies [1/cm] (scaled by 0.973):  
| 22.57 82.74 121.70 158.69 319.18 381.57  
| 386.94 915.93 1029.51 1030.29 1360.48 1419.56  
| 1424.61 2360.89 2988.50 3070.79 3074.09 3688.07  
| Vibrational zero-point energies [kcal/mol]:  
| 0.03 0.12 0.17 0.23 0.46 0.55  
| 0.55 1.31 1.47 1.47 1.94 2.03  
| 2.04 3.38 4.27 4.39 4.39 5.27  
| Vibrational zero-point energy: +0.05430270 hartree =  
| +34.08 kcal/mol =  
| +1.48 eV =  
| +11918.06 cm<sup>-1</sup>  
| V0 + zero-point energy (V1) : -208.43672518 hartree

Partition functions (pfns):

| T (K)  | Qtr (au)  | Qtr (cm <sup>-3</sup> ) | Qrot      | Qvib [V0]  | Qvib [V1] | Qel       |
|--------|-----------|-------------------------|-----------|------------|-----------|-----------|
| 10.00  | 3.893E-01 | 2.627E+24               | 3.872E+02 | 2.062E-745 | 1.040E+00 | 2.000E+00 |
| 20.00  | 1.101E+00 | 7.430E+24               | 1.095E+03 | 5.561E-373 | 1.249E+00 | 2.000E+00 |
| 30.00  | 2.023E+00 | 1.365E+25               | 2.012E+03 | 9.019E-249 | 1.547E+00 | 2.000E+00 |
| 40.00  | 3.114E+00 | 2.102E+25               | 3.098E+03 | 1.285E-186 | 1.926E+00 | 2.000E+00 |
| 50.00  | 4.352E+00 | 2.937E+25               | 4.329E+03 | 2.757E-149 | 2.404E+00 | 2.000E+00 |
| 60.00  | 5.721E+00 | 3.861E+25               | 5.691E+03 | 2.292E-124 | 3.002E+00 | 2.000E+00 |
| 70.00  | 7.210E+00 | 4.865E+25               | 7.171E+03 | 1.538E-106 | 3.742E+00 | 2.000E+00 |
| 80.00  | 8.809E+00 | 5.944E+25               | 8.762E+03 | 3.800E-93  | 4.652E+00 | 2.000E+00 |
| 90.00  | 1.051E+01 | 7.093E+25               | 1.045E+04 | 1.037E-82  | 5.762E+00 | 2.000E+00 |
| 100.00 | 1.231E+01 | 8.308E+25               | 1.224E+04 | 2.408E-74  | 7.112E+00 | 2.000E+00 |
| 110.00 | 1.420E+01 | 9.584E+25               | 1.413E+04 | 1.744E-67  | 8.743E+00 | 2.000E+00 |
| 120.00 | 1.618E+01 | 1.092E+26               | 1.610E+04 | 9.357E-62  | 1.071E+01 | 2.000E+00 |
| 130.00 | 1.825E+01 | 1.231E+26               | 1.815E+04 | 6.780E-57  | 1.306E+01 | 2.000E+00 |
| 140.00 | 2.039E+01 | 1.376E+26               | 2.028E+04 | 1.018E-52  | 1.588E+01 | 2.000E+00 |
| 150.00 | 2.262E+01 | 1.526E+26               | 2.249E+04 | 4.337E-49  | 1.923E+01 | 2.000E+00 |
| 160.00 | 2.491E+01 | 1.681E+26               | 2.478E+04 | 6.633E-46  | 2.321E+01 | 2.000E+00 |
| 170.00 | 2.729E+01 | 1.841E+26               | 2.714E+04 | 4.362E-43  | 2.791E+01 | 2.000E+00 |
| 180.00 | 2.973E+01 | 2.006E+26               | 2.957E+04 | 1.419E-40  | 3.345E+01 | 2.000E+00 |
| 190.00 | 3.224E+01 | 2.176E+26               | 3.207E+04 | 2.551E-38  | 3.996E+01 | 2.000E+00 |
| 200.00 | 3.482E+01 | 2.350E+26               | 3.463E+04 | 2.769E-36  | 4.758E+01 | 2.000E+00 |
| 210.00 | 3.746E+01 | 2.528E+26               | 3.726E+04 | 1.950E-34  | 5.649E+01 | 2.000E+00 |
| 220.00 | 4.017E+01 | 2.711E+26               | 3.996E+04 | 9.442E-33  | 6.687E+01 | 2.000E+00 |
| 230.00 | 4.294E+01 | 2.898E+26               | 4.271E+04 | 3.302E-31  | 7.892E+01 | 2.000E+00 |
| 240.00 | 4.577E+01 | 3.089E+26               | 4.553E+04 | 8.684E-30  | 9.290E+01 | 2.000E+00 |
| 250.00 | 4.866E+01 | 3.284E+26               | 4.840E+04 | 1.776E-28  | 1.091E+02 | 2.000E+00 |
| 260.00 | 5.161E+01 | 3.483E+26               | 5.133E+04 | 2.910E-27  | 1.277E+02 | 2.000E+00 |
| 270.00 | 5.462E+01 | 3.686E+26               | 5.432E+04 | 3.910E-26  | 1.492E+02 | 2.000E+00 |
| 280.00 | 5.768E+01 | 3.892E+26               | 5.737E+04 | 4.403E-25  | 1.739E+02 | 2.000E+00 |
| 300.00 | 6.397E+01 | 4.317E+26               | 6.362E+04 | 3.524E-23  | 2.347E+02 | 2.000E+00 |
| 320.00 | 7.047E+01 | 4.756E+26               | 7.009E+04 | 1.679E-21  | 3.141E+02 | 2.000E+00 |
| 340.00 | 7.718E+01 | 5.208E+26               | 7.677E+04 | 5.216E-20  | 4.172E+02 | 2.000E+00 |
| 360.00 | 8.409E+01 | 5.674E+26               | 8.364E+04 | 1.134E-18  | 5.503E+02 | 2.000E+00 |
| 400.00 | 9.848E+01 | 6.646E+26               | 9.796E+04 | 2.267E-16  | 9.396E+02 | 2.000E+00 |

Qtr : translational pfn per volume unit

Qrot: rotational pfn (rigid-rotor); includes rotational symmetry number

Qvib: vibrational pfn (harmonic-oscillator) relative to V0 and to V1

Qel : electronic pfn

| T (K)  | Qtot [V0]  | Qtot [V1] | Qtot [V0]  | Qtot [V1] |
|--------|------------|-----------|------------|-----------|
| 10.00  | 6.217E-743 | 3.137E+02 | 4.196E-718 | 2.117E+27 |
| 20.00  | 1.341E-369 | 3.013E+03 | 9.051E-345 | 2.033E+28 |
| 30.00  | 7.341E-245 | 1.259E+04 | 4.954E-220 | 8.497E+28 |
| 40.00  | 2.480E-182 | 3.716E+04 | 1.673E-157 | 2.508E+29 |
| 50.00  | 1.039E-144 | 9.060E+04 | 7.010E-120 | 6.114E+29 |
| 60.00  | 1.492E-119 | 1.955E+05 | 1.007E-94  | 1.319E+30 |
| 70.00  | 1.590E-101 | 3.869E+05 | 1.073E-76  | 2.611E+30 |
| 80.00  | 5.865E-88  | 7.180E+05 | 3.958E-63  | 4.845E+30 |
| 90.00  | 2.279E-77  | 1.266E+06 | 1.538E-52  | 8.546E+30 |
| 100.00 | 7.260E-69  | 2.144E+06 | 4.899E-44  | 1.447E+31 |
| 110.00 | 6.996E-62  | 3.508E+06 | 4.721E-37  | 2.368E+31 |
| 120.00 | 4.875E-56  | 5.578E+06 | 3.290E-31  | 3.764E+31 |
| 130.00 | 4.491E-51  | 8.653E+06 | 3.031E-26  | 5.839E+31 |
| 140.00 | 8.422E-47  | 1.314E+07 | 5.683E-22  | 8.865E+31 |
| 150.00 | 4.412E-43  | 1.957E+07 | 2.978E-18  | 1.320E+32 |
| 160.00 | 8.191E-40  | 2.866E+07 | 5.527E-15  | 1.934E+32 |
| 170.00 | 6.461E-37  | 4.134E+07 | 4.360E-12  | 2.790E+32 |

|        |           |           |           |           |
|--------|-----------|-----------|-----------|-----------|
| 180.00 | 2.495E-34 | 5.881E+07 | 1.684E-09 | 3.969E+32 |
| 190.00 | 5.275E-32 | 8.263E+07 | 3.560E-07 | 5.576E+32 |
| 200.00 | 6.678E-30 | 1.148E+08 | 4.507E-05 | 7.744E+32 |
| 210.00 | 5.443E-28 | 1.577E+08 | 3.673E-03 | 1.064E+33 |
| 220.00 | 3.031E-26 | 2.146E+08 | 2.045E-01 | 1.448E+33 |
| 230.00 | 1.211E-24 | 2.895E+08 | 8.174E+00 | 1.954E+33 |
| 240.00 | 3.619E-23 | 3.872E+08 | 2.442E+02 | 2.613E+33 |
| 250.00 | 8.368E-22 | 5.137E+08 | 5.647E+03 | 3.467E+33 |
| 260.00 | 1.542E-20 | 6.767E+08 | 1.040E+05 | 4.567E+33 |
| 270.00 | 2.320E-19 | 8.853E+08 | 1.566E+06 | 5.974E+33 |
| 280.00 | 2.914E-18 | 1.151E+09 | 1.966E+07 | 7.766E+33 |
| 300.00 | 2.868E-16 | 1.910E+09 | 1.936E+09 | 1.289E+34 |
| 320.00 | 1.659E-14 | 3.103E+09 | 1.119E+11 | 2.094E+34 |
| 340.00 | 6.180E-13 | 4.943E+09 | 4.171E+12 | 3.336E+34 |
| 360.00 | 1.594E-11 | 7.741E+09 | 1.076E+14 | 5.224E+34 |
| 400.00 | 4.373E-09 | 1.813E+10 | 2.951E+16 | 1.223E+35 |

-----  
|                                    in au                                    |                                    in cm^-3                                    |  
-----

Qtot: total pfn per unit volume  
\* [V0] --> from the bottom of the potential (V0)  
\* [V1] --> from the zero-point energy (V1)  
\* includes rotational symmetry number

Gibbs free energy (hartree):

| T (K)  | v = 1 cm <sup>3</sup> | v = kbT/p0    |
|--------|-----------------------|---------------|
| 10.00  | -208.43871774         | -208.43719666 |
| 20.00  | -208.44085357         | -208.43785532 |
| 30.00  | -208.44305363         | -208.43859478 |
| 40.00  | -208.44530021         | -208.43939151 |
| 50.00  | -208.44758506         | -208.44023452 |
| 60.00  | -208.44990314         | -208.44111714 |
| 70.00  | -208.45225085         | -208.44203468 |
| 80.00  | -208.45462543         | -208.44298363 |
| 90.00  | -208.45702471         | -208.44396126 |
| 100.00 | -208.45944694         | -208.44496536 |
| 110.00 | -208.46189067         | -208.44599414 |
| 120.00 | -208.46435466         | -208.44704606 |
| 130.00 | -208.46683785         | -208.44811982 |
| 140.00 | -208.46933930         | -208.44921427 |
| 150.00 | -208.47185817         | -208.45032841 |
| 160.00 | -208.47439370         | -208.45146132 |
| 170.00 | -208.47694520         | -208.45261219 |
| 180.00 | -208.47951205         | -208.45378027 |
| 190.00 | -208.48209369         | -208.45496489 |
| 200.00 | -208.48468957         | -208.45616544 |
| 210.00 | -208.48729924         | -208.45738134 |
| 220.00 | -208.48992223         | -208.45861209 |
| 230.00 | -208.49255816         | -208.45985720 |
| 240.00 | -208.49520664         | -208.46111625 |
| 250.00 | -208.49786732         | -208.46238881 |
| 260.00 | -208.50053988         | -208.46367453 |
| 270.00 | -208.50322403         | -208.46497305 |
| 280.00 | -208.50591949         | -208.46628405 |
| 300.00 | -208.51134331         | -208.46894232 |
| 320.00 | -208.51680945         | -208.47164713 |
| 340.00 | -208.52231627         | -208.47439658 |
| 360.00 | -208.52786228         | -208.47718894 |
| 400.00 | -208.53906666         | -208.48289642 |

-----  
v : volume per molecule  
p0: 1bar

## TS1a information

-----  
Analysis of STRUC: TS1a  
-----

Number of conformers: 1

V0 = electronic energy  
V1 = electronic energy + zero-point energy (ZPE)

ZPE is calculated using scaled frequencies  
Frequency scale factor: 0.97300

min(V0) = -208.47578120 hartree  
min(V1) = -208.42555963 hartree

Relative energies (in kcal/mol):

| name | V0-min(V0) | V1-min(V1) | ZPE   | mass (amu) | weight | PGS | imag.freq. |
|------|------------|------------|-------|------------|--------|-----|------------|
| 001  | 0.000      | 0.000      | 31.51 | 58.03      | 1      | Cs  | -1293.51   |

weight: equals 2 if the structure has a conformational enantiomer,  
equals 1 otherwise

PGS : point group of symmetry

-----  
Conformation: 001  
-----

| Molecular formula : C(2)H(4)NO  
| Number of atoms : 8  
| Number of electrons : 31  
| Vibrational DOFs : 18  
| Charge : 0  
| Multiplicity : 2  
| Electronic energy (V0): -208.47578120 hartree  
| Total mass [root] : 58.0293 amu  
| Total mass : 58.0293 amu  
| Point group symmetry : Cs  
| Rotational sym num : 1  
| Cartesian coordinates (Angstrom):  
| N +0.50652583 -0.56621703 -1.81284331 [ 14.003 amu]  
| C +0.50658384 -0.56628324 -0.66727861 [ 12.000 amu]  
| C +0.47690970 -0.53311375 +0.77324865 [ 12.000 amu]  
| H -0.28876253 +0.32279144 +1.11853867 [ 1.008 amu]  
| H +0.08754837 -1.45584679 +1.20280946 [ 1.008 amu]  
| H +1.43714414 -0.24853140 +1.20281088 [ 1.008 amu]  
| O -1.17417062 +1.31254347 +1.26464367 [ 15.995 amu]  
| H -1.34912985 +1.50812248 +0.33153978 [ 1.008 amu]  
| Moments and product of inertia (au):  
| +2.063E+05 +8.966E+05 +1.081E+06 [ 2.000E+17]  
| Vibrational frequencies [1/cm] (scaled by 0.973):  
| -1293.51 80.41 144.22 289.88 380.38 382.84  
| 719.20 806.41 949.94 1011.66 1109.68 1223.42  
| 1377.63 1397.75 2348.22 3024.20 3100.84 3698.03  
| Vibrational zero-point energies [kcal/mol]:  
| 0.00 0.11 0.21 0.41 0.54 0.55  
| 1.03 1.15 1.36 1.45 1.59 1.75  
| 1.97 2.00 3.36 4.32 4.43 5.29  
| Vibrational zero-point energy: +0.05022157 hartree =  
| +31.51 kcal/mol =  
| +1.37 eV =  
| +11022.36 cm<sup>-1</sup>  
| V0 + zero-point energy (V1) : -208.42555963 hartree



Partition functions (pfns):

| T (K)  | Qtr (au)  | Qtr (cm <sup>-3</sup> ) | Qrot      | Qvib [V0]  | Qvib [V1] | Qel       |
|--------|-----------|-------------------------|-----------|------------|-----------|-----------|
| 10.00  | 3.893E-01 | 2.627E+24               | 3.996E+02 | 1.842E-689 | 1.000E+00 | 2.000E+00 |
| 20.00  | 1.101E+00 | 7.430E+24               | 1.130E+03 | 4.306E-345 | 1.003E+00 | 2.000E+00 |
| 30.00  | 2.023E+00 | 1.365E+25               | 2.076E+03 | 2.701E-230 | 1.023E+00 | 2.000E+00 |
| 40.00  | 3.114E+00 | 2.102E+25               | 3.196E+03 | 6.975E-173 | 1.065E+00 | 2.000E+00 |
| 50.00  | 4.352E+00 | 2.937E+25               | 4.467E+03 | 2.020E-138 | 1.128E+00 | 2.000E+00 |
| 60.00  | 5.721E+00 | 3.861E+25               | 5.872E+03 | 1.966E-115 | 1.210E+00 | 2.000E+00 |
| 70.00  | 7.210E+00 | 4.865E+25               | 7.400E+03 | 5.323E-99  | 1.309E+00 | 2.000E+00 |
| 80.00  | 8.809E+00 | 5.944E+25               | 9.041E+03 | 1.153E-86  | 1.424E+00 | 2.000E+00 |
| 90.00  | 1.051E+01 | 7.093E+25               | 1.079E+04 | 4.638E-77  | 1.557E+00 | 2.000E+00 |
| 100.00 | 1.231E+01 | 8.308E+25               | 1.264E+04 | 2.286E-69  | 1.708E+00 | 2.000E+00 |
| 110.00 | 1.420E+01 | 9.584E+25               | 1.458E+04 | 4.589E-63  | 1.879E+00 | 2.000E+00 |
| 120.00 | 1.618E+01 | 1.092E+26               | 1.661E+04 | 8.348E-58  | 2.071E+00 | 2.000E+00 |
| 130.00 | 1.825E+01 | 1.231E+26               | 1.873E+04 | 2.396E-53  | 2.286E+00 | 2.000E+00 |
| 140.00 | 2.039E+01 | 1.376E+26               | 2.093E+04 | 1.611E-49  | 2.526E+00 | 2.000E+00 |
| 150.00 | 2.262E+01 | 1.526E+26               | 2.321E+04 | 3.392E-46  | 2.793E+00 | 2.000E+00 |
| 160.00 | 2.491E+01 | 1.681E+26               | 2.557E+04 | 2.781E-43  | 3.091E+00 | 2.000E+00 |
| 170.00 | 2.729E+01 | 1.841E+26               | 2.801E+04 | 1.048E-40  | 3.422E+00 | 2.000E+00 |
| 180.00 | 2.973E+01 | 2.006E+26               | 3.051E+04 | 2.068E-38  | 3.790E+00 | 2.000E+00 |
| 190.00 | 3.224E+01 | 2.176E+26               | 3.309E+04 | 2.365E-36  | 4.198E+00 | 2.000E+00 |
| 200.00 | 3.482E+01 | 2.350E+26               | 3.574E+04 | 1.701E-34  | 4.650E+00 | 2.000E+00 |
| 210.00 | 3.746E+01 | 2.528E+26               | 3.845E+04 | 8.221E-33  | 5.150E+00 | 2.000E+00 |
| 220.00 | 4.017E+01 | 2.711E+26               | 4.123E+04 | 2.819E-31  | 5.704E+00 | 2.000E+00 |
| 230.00 | 4.294E+01 | 2.898E+26               | 4.407E+04 | 7.170E-30  | 6.317E+00 | 2.000E+00 |
| 240.00 | 4.577E+01 | 3.089E+26               | 4.698E+04 | 1.404E-28  | 6.994E+00 | 2.000E+00 |
| 250.00 | 4.866E+01 | 3.284E+26               | 4.994E+04 | 2.185E-27  | 7.743E+00 | 2.000E+00 |
| 260.00 | 5.161E+01 | 3.483E+26               | 5.297E+04 | 2.775E-26  | 8.571E+00 | 2.000E+00 |
| 270.00 | 5.462E+01 | 3.686E+26               | 5.606E+04 | 2.940E-25  | 9.485E+00 | 2.000E+00 |
| 280.00 | 5.768E+01 | 3.892E+26               | 5.920E+04 | 2.650E-24  | 1.049E+01 | 2.000E+00 |
| 300.00 | 6.397E+01 | 4.317E+26               | 6.565E+04 | 1.415E-22  | 1.284E+01 | 2.000E+00 |
| 320.00 | 7.047E+01 | 4.756E+26               | 7.233E+04 | 4.706E-21  | 1.569E+01 | 2.000E+00 |
| 340.00 | 7.718E+01 | 5.208E+26               | 7.921E+04 | 1.060E-19  | 1.915E+01 | 2.000E+00 |
| 360.00 | 8.409E+01 | 5.674E+26               | 8.630E+04 | 1.726E-18  | 2.336E+01 | 2.000E+00 |
| 400.00 | 9.848E+01 | 6.646E+26               | 1.011E+05 | 2.095E-16  | 3.464E+01 | 2.000E+00 |

Qtr : translational pfn per volume unit  
 Qrot: rotational pfn (rigid-rotor); includes rotational symmetry number  
 Qvib: vibrational pfn (harmonic-oscillator) relative to V0 and to V1  
 Qel : electronic pfn

| T (K)  | Qtot [V0]  | Qtot [V1] | Qtot [V0]  | Qtot [V1] |
|--------|------------|-----------|------------|-----------|
| 10.00  | 5.732E-687 | 3.111E+02 | 3.868E-662 | 2.099E+27 |
| 20.00  | 1.072E-341 | 2.496E+03 | 7.231E-317 | 1.685E+28 |
| 30.00  | 2.269E-226 | 8.589E+03 | 1.531E-201 | 5.796E+28 |
| 40.00  | 1.389E-168 | 2.120E+04 | 9.372E-144 | 1.430E+29 |
| 50.00  | 7.854E-134 | 4.386E+04 | 5.300E-109 | 2.960E+29 |
| 60.00  | 1.321E-110 | 8.128E+04 | 8.914E-86  | 5.485E+29 |
| 70.00  | 5.680E-94  | 1.396E+05 | 3.833E-69  | 9.423E+29 |
| 80.00  | 1.836E-81  | 2.269E+05 | 1.239E-56  | 1.531E+30 |
| 90.00  | 1.052E-71  | 3.532E+05 | 7.098E-47  | 2.383E+30 |
| 100.00 | 7.113E-64  | 5.315E+05 | 4.800E-39  | 3.587E+30 |
| 110.00 | 1.900E-57  | 7.780E+05 | 1.282E-32  | 5.250E+30 |
| 120.00 | 4.488E-52  | 1.113E+06 | 3.028E-27  | 7.512E+30 |
| 130.00 | 1.637E-47  | 1.562E+06 | 1.105E-22  | 1.054E+31 |
| 140.00 | 1.375E-43  | 2.156E+06 | 9.279E-19  | 1.455E+31 |
| 150.00 | 3.561E-40  | 2.933E+06 | 2.403E-15  | 1.979E+31 |
| 160.00 | 3.544E-37  | 3.939E+06 | 2.391E-12  | 2.658E+31 |
| 170.00 | 1.602E-34  | 5.230E+06 | 1.081E-09  | 3.530E+31 |

|        |           |           |           |           |
|--------|-----------|-----------|-----------|-----------|
| 180.00 | 3.752E-32 | 6.876E+06 | 2.532E-07 | 4.640E+31 |
| 190.00 | 5.046E-30 | 8.957E+06 | 3.405E-05 | 6.044E+31 |
| 200.00 | 4.233E-28 | 1.157E+07 | 2.857E-03 | 7.809E+31 |
| 210.00 | 2.368E-26 | 1.484E+07 | 1.598E-01 | 1.001E+32 |
| 220.00 | 9.337E-25 | 1.889E+07 | 6.301E+00 | 1.275E+32 |
| 230.00 | 2.714E-23 | 2.391E+07 | 1.831E+02 | 1.613E+32 |
| 240.00 | 6.039E-22 | 3.008E+07 | 4.076E+03 | 2.030E+32 |
| 250.00 | 1.062E-20 | 3.764E+07 | 7.169E+04 | 2.540E+32 |
| 260.00 | 1.517E-19 | 4.686E+07 | 1.024E+06 | 3.162E+32 |
| 270.00 | 1.800E-18 | 5.808E+07 | 1.215E+07 | 3.919E+32 |
| 280.00 | 1.810E-17 | 7.166E+07 | 1.221E+08 | 4.836E+32 |
| 300.00 | 1.188E-15 | 1.078E+08 | 8.018E+09 | 7.276E+32 |
| 320.00 | 4.797E-14 | 1.599E+08 | 3.237E+11 | 1.079E+33 |
| 340.00 | 1.296E-12 | 2.342E+08 | 8.747E+12 | 1.580E+33 |
| 360.00 | 2.505E-11 | 3.391E+08 | 1.690E+14 | 2.288E+33 |
| 400.00 | 4.172E-09 | 6.897E+08 | 2.815E+16 | 4.655E+33 |

-----  
|                                    in au                                    |                                    in cm<sup>-3</sup>                                    |  
-----

Qtot: total pfn per unit volume

\* [V0] --> from the bottom of the potential (V0)

\* [V1] --> from the zero-point energy (V1)

\* includes rotational symmetry number

Gibbs free energy (hartree):

| T (K)  | v = 1 cm <sup>3</sup> | v = kbT/p0    |
|--------|-----------------------|---------------|
| 10.00  | -208.42755192         | -208.42603084 |
| 20.00  | -208.42967611         | -208.42667786 |
| 30.00  | -208.43185174         | -208.42739289 |
| 40.00  | -208.43406354         | -208.42815484 |
| 50.00  | -208.43630464         | -208.42895410 |
| 60.00  | -208.43857087         | -208.42978486 |
| 70.00  | -208.44085936         | -208.43064319 |
| 80.00  | -208.44316801         | -208.43152621 |
| 90.00  | -208.44549520         | -208.43243175 |
| 100.00 | -208.44783969         | -208.43335811 |
| 110.00 | -208.45020045         | -208.43430392 |
| 120.00 | -208.45257664         | -208.43526804 |
| 130.00 | -208.45496754         | -208.43624951 |
| 140.00 | -208.45737253         | -208.43724750 |
| 150.00 | -208.45979103         | -208.43826128 |
| 160.00 | -208.46222257         | -208.43929020 |
| 170.00 | -208.46466671         | -208.44033370 |
| 180.00 | -208.46712303         | -208.44139126 |
| 190.00 | -208.46959120         | -208.44246241 |
| 200.00 | -208.47207087         | -208.44354674 |
| 210.00 | -208.47456177         | -208.44464387 |
| 220.00 | -208.47706361         | -208.44575347 |
| 230.00 | -208.47957616         | -208.44687520 |
| 240.00 | -208.48209919         | -208.44800880 |
| 250.00 | -208.48463249         | -208.44915399 |
| 260.00 | -208.48717588         | -208.45031053 |
| 270.00 | -208.48972918         | -208.45147820 |
| 280.00 | -208.49229222         | -208.45265679 |
| 300.00 | -208.49744694         | -208.45504595 |
| 320.00 | -208.50263890         | -208.45747658 |
| 340.00 | -208.50786710         | -208.45994741 |
| 360.00 | -208.51313061         | -208.46245728 |
| 400.00 | -208.52376025         | -208.46759001 |

-----  
v : volume per molecule

p0: 1bar

## TS1b information

-----  
Analysis of STRUC: TS1b  
-----

Number of conformers: 1

V0 = electronic energy  
V1 = electronic energy + zero-point energy (ZPE)

ZPE is calculated using scaled frequencies  
Frequency scale factor: 0.97300

min(V0) = -208.48294650 hartree  
min(V1) = -208.42748030 hartree

Relative energies (in kcal/mol):

| name | V0-min(V0) | V1-min(V1) | ZPE   | mass (amu) | weight | PGS | imag.freq. |
|------|------------|------------|-------|------------|--------|-----|------------|
| 001  | 0.000      | 0.000      | 34.81 | 58.03      | 1      | Cs  | -691.53    |

weight: equals 2 if the structure has a conformational enantiomer,  
equals 1 otherwise

PGS : point group of symmetry

-----  
Conformation: 001  
-----

| Molecular formula : C(2)H(4)NO  
| Number of atoms : 8  
| Number of electrons : 31  
| Vibrational DOFs : 18  
| Charge : 0  
| Multiplicity : 2  
| Electronic energy (V0): -208.48294650 hartree  
| Total mass [root] : 58.0293 amu  
| Total mass : 58.0293 amu  
| Point group symmetry : Cs  
| Rotational sym num : 1  
| Cartesian coordinates (Angstrom):  
| C -0.46676007 -0.00000000 -1.42882242 [ 12.000 amu]  
| C -0.46676007 -0.00000000 +0.03611256 [ 12.000 amu]  
| O +1.44299322 -0.00000000 +0.31040506 [ 15.995 amu]  
| N -0.85791855 +0.00000000 +1.13294357 [ 14.003 amu]  
| H +0.06252529 -0.88513636 -1.78395679 [ 1.008 amu]  
| H -1.49399153 +0.00000000 -1.79399951 [ 1.008 amu]  
| H +0.06252529 +0.88513636 -1.78395679 [ 1.008 amu]  
| H +1.50307965 +0.00000000 +1.27680839 [ 1.008 amu]  
| Moments and product of inertia (au):  
| +3.260E+05 +4.022E+05 +7.076E+05 [ 9.278E+16]  
| Vibrational frequencies [1/cm] (scaled by 0.973):  
| -691.53 140.85 221.22 262.84 369.52 403.23  
| 814.53 896.96 1002.59 1032.77 1354.03 1417.01  
| 1426.41 2135.87 2993.69 3078.33 3087.16 3709.84  
| Vibrational zero-point energies [kcal/mol]:  
| 0.00 0.20 0.32 0.38 0.53 0.58  
| 1.16 1.28 1.43 1.48 1.94 2.03  
| 2.04 3.05 4.28 4.40 4.41 5.30  
| Vibrational zero-point energy: +0.05546620 hartree =  
| +34.81 kcal/mol =  
| +1.51 eV =  
| +12173.42 cm<sup>-1</sup>  
| V0 + zero-point energy (V1) : -208.42748030 hartree

Partition functions (pfns):

| T (K)  | Qtr (au)  | Qtr (cm <sup>-3</sup> ) | Qrot      | Qvib [V0]  | Qvib [V1] | Qel       |
|--------|-----------|-------------------------|-----------|------------|-----------|-----------|
| 10.00  | 3.893E-01 | 2.627E+24               | 2.721E+02 | 2.192E-761 | 1.000E+00 | 2.000E+00 |
| 20.00  | 1.101E+00 | 7.430E+24               | 7.697E+02 | 4.683E-381 | 1.000E+00 | 2.000E+00 |
| 30.00  | 2.023E+00 | 1.365E+25               | 1.414E+03 | 2.802E-254 | 1.001E+00 | 2.000E+00 |
| 40.00  | 3.114E+00 | 2.102E+25               | 2.177E+03 | 6.889E-191 | 1.007E+00 | 2.000E+00 |
| 50.00  | 4.352E+00 | 2.937E+25               | 3.043E+03 | 7.530E-153 | 1.020E+00 | 2.000E+00 |
| 60.00  | 5.721E+00 | 3.861E+25               | 4.000E+03 | 1.744E-127 | 1.043E+00 | 2.000E+00 |
| 70.00  | 7.210E+00 | 4.865E+25               | 5.040E+03 | 2.323E-109 | 1.076E+00 | 2.000E+00 |
| 80.00  | 8.809E+00 | 5.944E+25               | 6.158E+03 | 9.257E-96  | 1.119E+00 | 2.000E+00 |
| 90.00  | 1.051E+01 | 7.093E+25               | 7.348E+03 | 3.563E-85  | 1.174E+00 | 2.000E+00 |
| 100.00 | 1.231E+01 | 8.308E+25               | 8.606E+03 | 1.065E-76  | 1.239E+00 | 2.000E+00 |
| 110.00 | 1.420E+01 | 9.584E+25               | 9.928E+03 | 9.306E-70  | 1.317E+00 | 2.000E+00 |
| 120.00 | 1.618E+01 | 1.092E+26               | 1.131E+04 | 5.753E-64  | 1.407E+00 | 2.000E+00 |
| 130.00 | 1.825E+01 | 1.231E+26               | 1.276E+04 | 4.639E-59  | 1.509E+00 | 2.000E+00 |
| 140.00 | 2.039E+01 | 1.376E+26               | 1.426E+04 | 7.550E-55  | 1.625E+00 | 2.000E+00 |
| 150.00 | 2.262E+01 | 1.526E+26               | 1.581E+04 | 3.417E-51  | 1.755E+00 | 2.000E+00 |
| 160.00 | 2.491E+01 | 1.681E+26               | 1.742E+04 | 5.464E-48  | 1.900E+00 | 2.000E+00 |
| 170.00 | 2.729E+01 | 1.841E+26               | 1.907E+04 | 3.711E-45  | 2.062E+00 | 2.000E+00 |
| 180.00 | 2.973E+01 | 2.006E+26               | 2.078E+04 | 1.235E-42  | 2.241E+00 | 2.000E+00 |
| 190.00 | 3.224E+01 | 2.176E+26               | 2.254E+04 | 2.252E-40  | 2.439E+00 | 2.000E+00 |
| 200.00 | 3.482E+01 | 2.350E+26               | 2.434E+04 | 2.464E-38  | 2.658E+00 | 2.000E+00 |
| 210.00 | 3.746E+01 | 2.528E+26               | 2.619E+04 | 1.739E-36  | 2.899E+00 | 2.000E+00 |
| 220.00 | 4.017E+01 | 2.711E+26               | 2.808E+04 | 8.410E-35  | 3.164E+00 | 2.000E+00 |
| 230.00 | 4.294E+01 | 2.898E+26               | 3.002E+04 | 2.927E-33  | 3.455E+00 | 2.000E+00 |
| 240.00 | 4.577E+01 | 3.089E+26               | 3.200E+04 | 7.635E-32  | 3.775E+00 | 2.000E+00 |
| 250.00 | 4.866E+01 | 3.284E+26               | 3.402E+04 | 1.546E-30  | 4.127E+00 | 2.000E+00 |
| 260.00 | 5.161E+01 | 3.483E+26               | 3.608E+04 | 2.501E-29  | 4.511E+00 | 2.000E+00 |
| 270.00 | 5.462E+01 | 3.686E+26               | 3.818E+04 | 3.316E-28  | 4.933E+00 | 2.000E+00 |
| 280.00 | 5.768E+01 | 3.892E+26               | 4.032E+04 | 3.678E-27  | 5.395E+00 | 2.000E+00 |
| 300.00 | 6.397E+01 | 4.317E+26               | 4.472E+04 | 2.848E-25  | 6.454E+00 | 2.000E+00 |
| 320.00 | 7.047E+01 | 4.756E+26               | 4.926E+04 | 1.309E-23  | 7.721E+00 | 2.000E+00 |
| 340.00 | 7.718E+01 | 5.208E+26               | 5.395E+04 | 3.919E-22  | 9.235E+00 | 2.000E+00 |
| 360.00 | 8.409E+01 | 5.674E+26               | 5.878E+04 | 8.196E-21  | 1.104E+01 | 2.000E+00 |
| 400.00 | 9.848E+01 | 6.646E+26               | 6.885E+04 | 1.517E-18  | 1.576E+01 | 2.000E+00 |

Qtr : translational pfn per volume unit  
 Qrot: rotational pfn (rigid-rotor); includes rotational symmetry number  
 Qvib: vibrational pfn (harmonic-oscillator) relative to V0 and to V1  
 Qel : electronic pfn

| T (K)  | Qtot [V0]  | Qtot [V1] | Qtot [V0]  | Qtot [V1] |
|--------|------------|-----------|------------|-----------|
| 10.00  | 4.645E-759 | 2.119E+02 | 3.135E-734 | 1.430E+27 |
| 20.00  | 7.937E-378 | 1.695E+03 | 5.356E-353 | 1.144E+28 |
| 30.00  | 1.603E-250 | 5.728E+03 | 1.082E-225 | 3.865E+28 |
| 40.00  | 9.342E-187 | 1.365E+04 | 6.304E-162 | 9.213E+28 |
| 50.00  | 1.994E-148 | 2.701E+04 | 1.346E-123 | 1.823E+29 |
| 60.00  | 7.983E-123 | 4.772E+04 | 5.387E-98  | 3.220E+29 |
| 70.00  | 1.688E-104 | 7.816E+04 | 1.139E-79  | 5.275E+29 |
| 80.00  | 1.004E-90  | 1.214E+05 | 6.777E-66  | 8.193E+29 |
| 90.00  | 5.504E-80  | 1.813E+05 | 3.714E-55  | 1.223E+30 |
| 100.00 | 2.256E-71  | 2.626E+05 | 1.523E-46  | 1.772E+30 |
| 110.00 | 2.624E-64  | 3.714E+05 | 1.771E-39  | 2.506E+30 |
| 120.00 | 2.106E-58  | 5.150E+05 | 1.421E-33  | 3.475E+30 |
| 130.00 | 2.159E-53  | 7.024E+05 | 1.457E-28  | 4.740E+30 |
| 140.00 | 4.390E-49  | 9.446E+05 | 2.962E-24  | 6.374E+30 |
| 150.00 | 2.443E-45  | 1.255E+06 | 1.649E-20  | 8.468E+30 |
| 160.00 | 4.742E-42  | 1.649E+06 | 3.200E-17  | 1.113E+31 |
| 170.00 | 3.864E-39  | 2.146E+06 | 2.607E-14  | 1.448E+31 |

|        |           |           |           |           |
|--------|-----------|-----------|-----------|-----------|
| 180.00 | 1.526E-36 | 2.769E+06 | 1.030E-11 | 1.869E+31 |
| 190.00 | 3.272E-34 | 3.545E+06 | 2.208E-09 | 2.392E+31 |
| 200.00 | 4.176E-32 | 4.505E+06 | 2.818E-07 | 3.040E+31 |
| 210.00 | 3.413E-30 | 5.688E+06 | 2.303E-05 | 3.838E+31 |
| 220.00 | 1.897E-28 | 7.138E+06 | 1.280E-03 | 4.817E+31 |
| 230.00 | 7.545E-27 | 8.908E+06 | 5.091E-02 | 6.011E+31 |
| 240.00 | 2.236E-25 | 1.106E+07 | 1.509E+00 | 7.463E+31 |
| 250.00 | 5.118E-24 | 1.366E+07 | 3.454E+01 | 9.219E+31 |
| 260.00 | 9.316E-23 | 1.680E+07 | 6.287E+02 | 1.134E+32 |
| 270.00 | 1.383E-21 | 2.057E+07 | 9.332E+03 | 1.388E+32 |
| 280.00 | 1.711E-20 | 2.509E+07 | 1.154E+05 | 1.693E+32 |
| 300.00 | 1.629E-18 | 3.692E+07 | 1.100E+07 | 2.492E+32 |
| 320.00 | 9.092E-17 | 5.361E+07 | 6.135E+08 | 3.618E+32 |
| 340.00 | 3.263E-15 | 7.691E+07 | 2.202E+10 | 5.190E+32 |
| 360.00 | 8.102E-14 | 1.092E+08 | 5.468E+11 | 7.366E+32 |
| 400.00 | 2.057E-11 | 2.136E+08 | 1.388E+14 | 1.442E+33 |

-----  
|                                    in au                                    |                                    in cm<sup>-3</sup>                                    |  
-----

Qtot: total pfn per unit volume  
\* [V0] --> from the bottom of the potential (V0)  
\* [V1] --> from the zero-point energy (V1)  
\* includes rotational symmetry number

Gibbs free energy (hartree):

| T (K)  | v = 1 cm <sup>3</sup> | v = kbT/p0    |
|--------|-----------------------|---------------|
| 10.00  | -208.42946043         | -208.42793935 |
| 20.00  | -208.43157226         | -208.42857401 |
| 30.00  | -208.43373391         | -208.42927506 |
| 40.00  | -208.43592848         | -208.43001978 |
| 50.00  | -208.43814858         | -208.43079804 |
| 60.00  | -208.44039034         | -208.43160433 |
| 70.00  | -208.44265141         | -208.43243525 |
| 80.00  | -208.44493027         | -208.43328848 |
| 90.00  | -208.44722579         | -208.43416234 |
| 100.00 | -208.44953711         | -208.43505553 |
| 110.00 | -208.45186351         | -208.43596698 |
| 120.00 | -208.45420438         | -208.43689577 |
| 130.00 | -208.45655915         | -208.43784112 |
| 140.00 | -208.45892732         | -208.43880230 |
| 150.00 | -208.46130843         | -208.43977868 |
| 160.00 | -208.46370205         | -208.44076968 |
| 170.00 | -208.46610777         | -208.44177477 |
| 180.00 | -208.46852524         | -208.44279346 |
| 190.00 | -208.47095411         | -208.44382532 |
| 200.00 | -208.47339407         | -208.44486993 |
| 210.00 | -208.47584482         | -208.44592693 |
| 220.00 | -208.47830612         | -208.44699597 |
| 230.00 | -208.48077770         | -208.44807674 |
| 240.00 | -208.48325933         | -208.44916894 |
| 250.00 | -208.48575082         | -208.45027232 |
| 260.00 | -208.48825196         | -208.45138661 |
| 270.00 | -208.49076256         | -208.45251158 |
| 280.00 | -208.49328247         | -208.45364703 |
| 300.00 | -208.49834955         | -208.45594855 |
| 320.00 | -208.50345201         | -208.45828969 |
| 340.00 | -208.50858883         | -208.46066914 |
| 360.00 | -208.51375905         | -208.46308572 |
| 400.00 | -208.52419631         | -208.46802607 |

-----  
| v : volume per molecule  
| p0: 1bar

## CH<sub>3</sub>C(OH)N information

-----  
Analysis of STRUC: CH3C(OH)N  
-----

Number of conformers: 1

V0 = electronic energy  
V1 = electronic energy + zero-point energy (ZPE)

ZPE is calculated using scaled frequencies  
Frequency scale factor: 0.97300

min(V0) = -208.53099790 hartree  
min(V1) = -208.47176626 hartree

Relative energies (in kcal/mol):

| name | V0-min(V0) | V1-min(V1) | ZPE   | mass (amu) | weight | PGS |
|------|------------|------------|-------|------------|--------|-----|
| 001  | 0.000      | 0.000      | 37.17 | 58.03      | 1      | Cs  |

weight: equals 2 if the structure has a conformational enantiomer,  
equals 1 otherwise

PGS : point group of symmetry

-----  
Conformation: 001  
-----

| Molecular formula : C(2)H(4)NO  
| Number of atoms : 8  
| Number of electrons : 31  
| Vibrational DOFs : 18  
| Charge : 0  
| Multiplicity : 2  
| Electronic energy (V0): -208.53099790 hartree  
| Total mass [root] : 58.0293 amu  
| Total mass : 58.0293 amu  
| Point group symmetry : Cs  
| Rotational sym num : 1  
| Cartesian coordinates (Angstrom):  
| N -0.00912958 -0.00000006 -1.38236074 [ 14.003 amu]  
| C -0.00912958 -0.00000006 -0.13073032 [ 12.000 amu]  
| O +1.12906676 -0.00000006 +0.60735532 [ 15.995 amu]  
| C -1.25317533 -0.00000006 +0.70207476 [ 12.000 amu]  
| H -1.25752679 +0.88592765 +1.34172901 [ 1.008 amu]  
| H -2.13593156 +0.00000094 +0.06444604 [ 1.008 amu]  
| H -1.25753173 -0.88592257 +1.34173475 [ 1.008 amu]  
| H +1.88878430 -0.00000302 +0.01702177 [ 1.008 amu]  
| Moments and product of inertia (au):  
| +2.804E+05 +3.458E+05 +6.056E+05 [ 5.872E+16]  
| Vibrational frequencies [1/cm] (scaled by 0.973):  
| 163.66 368.66 465.11 467.58 554.94 769.00  
| 974.39 1021.08 1166.00 1287.79 1354.90 1419.05  
| 1424.64 1699.00 2971.03 3053.46 3086.90 3752.48  
| Vibrational zero-point energies [kcal/mol]:  
| 0.23 0.53 0.66 0.67 0.79 1.10  
| 1.39 1.46 1.67 1.84 1.94 2.03  
| 2.04 2.43 4.25 4.37 4.41 5.36  
| Vibrational zero-point energy: +0.05923164 hartree =  
| +37.17 kcal/mol =  
| +1.61 eV =  
| +12999.84 cm<sup>-1</sup>  
| V0 + zero-point energy (V1) : -208.47176626 hartree

Partition functions (pfns):

| T (K)  | Qtr (au)  | Qtr (cm <sup>-3</sup> ) | Qrot      | Qvib [V0]  | Qvib [V1] | Qel       |
|--------|-----------|-------------------------|-----------|------------|-----------|-----------|
| 10.00  | 3.893E-01 | 2.627E+24               | 2.165E+02 | 5.035E-813 | 1.000E+00 | 2.000E+00 |
| 20.00  | 1.101E+00 | 7.430E+24               | 6.123E+02 | 7.096E-407 | 1.000E+00 | 2.000E+00 |
| 30.00  | 2.023E+00 | 1.365E+25               | 1.125E+03 | 1.715E-271 | 1.000E+00 | 2.000E+00 |
| 40.00  | 3.114E+00 | 2.102E+25               | 1.732E+03 | 8.447E-204 | 1.003E+00 | 2.000E+00 |
| 50.00  | 4.352E+00 | 2.937E+25               | 2.420E+03 | 3.502E-163 | 1.009E+00 | 2.000E+00 |
| 60.00  | 5.721E+00 | 3.861E+25               | 3.182E+03 | 4.224E-136 | 1.020E+00 | 2.000E+00 |
| 70.00  | 7.210E+00 | 4.865E+25               | 4.009E+03 | 9.397E-117 | 1.037E+00 | 2.000E+00 |
| 80.00  | 8.809E+00 | 5.944E+25               | 4.899E+03 | 3.069E-102 | 1.058E+00 | 2.000E+00 |
| 90.00  | 1.051E+01 | 7.093E+25               | 5.845E+03 | 6.017E-91  | 1.083E+00 | 2.000E+00 |
| 100.00 | 1.231E+01 | 8.308E+25               | 6.846E+03 | 6.560E-82  | 1.114E+00 | 2.000E+00 |
| 110.00 | 1.420E+01 | 9.584E+25               | 7.898E+03 | 1.640E-74  | 1.148E+00 | 2.000E+00 |
| 120.00 | 1.618E+01 | 1.092E+26               | 8.999E+03 | 2.418E-68  | 1.188E+00 | 2.000E+00 |
| 130.00 | 1.825E+01 | 1.231E+26               | 1.015E+04 | 4.041E-63  | 1.233E+00 | 2.000E+00 |
| 140.00 | 2.039E+01 | 1.376E+26               | 1.134E+04 | 1.222E-58  | 1.283E+00 | 2.000E+00 |
| 150.00 | 2.262E+01 | 1.526E+26               | 1.258E+04 | 9.406E-55  | 1.338E+00 | 2.000E+00 |
| 160.00 | 2.491E+01 | 1.681E+26               | 1.386E+04 | 2.385E-51  | 1.400E+00 | 2.000E+00 |
| 170.00 | 2.729E+01 | 1.841E+26               | 1.517E+04 | 2.423E-48  | 1.467E+00 | 2.000E+00 |
| 180.00 | 2.973E+01 | 2.006E+26               | 1.653E+04 | 1.149E-45  | 1.541E+00 | 2.000E+00 |
| 190.00 | 3.224E+01 | 2.176E+26               | 1.793E+04 | 2.869E-43  | 1.623E+00 | 2.000E+00 |
| 200.00 | 3.482E+01 | 2.350E+26               | 1.936E+04 | 4.153E-41  | 1.711E+00 | 2.000E+00 |
| 210.00 | 3.746E+01 | 2.528E+26               | 2.083E+04 | 3.769E-39  | 1.808E+00 | 2.000E+00 |
| 220.00 | 4.017E+01 | 2.711E+26               | 2.234E+04 | 2.286E-37  | 1.913E+00 | 2.000E+00 |
| 230.00 | 4.294E+01 | 2.898E+26               | 2.388E+04 | 9.761E-36  | 2.027E+00 | 2.000E+00 |
| 240.00 | 4.577E+01 | 3.089E+26               | 2.545E+04 | 3.068E-34  | 2.151E+00 | 2.000E+00 |
| 250.00 | 4.866E+01 | 3.284E+26               | 2.706E+04 | 7.363E-33  | 2.285E+00 | 2.000E+00 |
| 260.00 | 5.161E+01 | 3.483E+26               | 2.870E+04 | 1.392E-31  | 2.431E+00 | 2.000E+00 |
| 270.00 | 5.462E+01 | 3.686E+26               | 3.037E+04 | 2.129E-30  | 2.589E+00 | 2.000E+00 |
| 280.00 | 5.768E+01 | 3.892E+26               | 3.208E+04 | 2.694E-29  | 2.761E+00 | 2.000E+00 |
| 300.00 | 6.397E+01 | 4.317E+26               | 3.557E+04 | 2.639E-27  | 3.148E+00 | 2.000E+00 |
| 320.00 | 7.047E+01 | 4.756E+26               | 3.919E+04 | 1.486E-25  | 3.601E+00 | 2.000E+00 |
| 340.00 | 7.718E+01 | 5.208E+26               | 4.292E+04 | 5.310E-24  | 4.132E+00 | 2.000E+00 |
| 360.00 | 8.409E+01 | 5.674E+26               | 4.676E+04 | 1.298E-22  | 4.754E+00 | 2.000E+00 |
| 400.00 | 9.848E+01 | 6.646E+26               | 5.477E+04 | 3.122E-20  | 6.337E+00 | 2.000E+00 |

Qtr : translational pfn per volume unit

Qrot: rotational pfn (rigid-rotor); includes rotational symmetry number

Qvib: vibrational pfn (harmonic-oscillator) relative to V0 and to V1

Qel : electronic pfn

| T (K)  | Qtot [V0]  | Qtot [V1] | Qtot [V0]  | Qtot [V1] |
|--------|------------|-----------|------------|-----------|
| 10.00  | 8.487E-811 | 1.686E+02 | 5.727E-786 | 1.137E+27 |
| 20.00  | 9.568E-404 | 1.348E+03 | 6.457E-379 | 9.100E+27 |
| 30.00  | 7.803E-268 | 4.553E+03 | 5.266E-243 | 3.072E+28 |
| 40.00  | 9.112E-200 | 1.082E+04 | 6.149E-175 | 7.300E+28 |
| 50.00  | 7.379E-159 | 2.126E+04 | 4.980E-134 | 1.435E+29 |
| 60.00  | 1.538E-131 | 3.715E+04 | 1.038E-106 | 2.507E+29 |
| 70.00  | 5.433E-112 | 5.993E+04 | 3.666E-87  | 4.044E+29 |
| 80.00  | 2.649E-97  | 9.127E+04 | 1.788E-72  | 6.159E+29 |
| 90.00  | 7.394E-86  | 1.331E+05 | 4.989E-61  | 8.982E+29 |
| 100.00 | 1.106E-76  | 1.877E+05 | 7.462E-52  | 1.267E+30 |
| 110.00 | 3.679E-69  | 2.577E+05 | 2.483E-44  | 1.739E+30 |
| 120.00 | 7.042E-63  | 3.461E+05 | 4.752E-38  | 2.335E+30 |
| 130.00 | 1.496E-57  | 4.566E+05 | 1.010E-32  | 3.081E+30 |
| 140.00 | 5.650E-53  | 5.934E+05 | 3.813E-28  | 4.004E+30 |
| 150.00 | 5.351E-49  | 7.614E+05 | 3.611E-24  | 5.138E+30 |
| 160.00 | 1.646E-45  | 9.664E+05 | 1.111E-20  | 6.522E+30 |
| 170.00 | 2.006E-42  | 1.215E+06 | 1.354E-17  | 8.200E+30 |





## CH<sub>2</sub>CN information

-----  
 Analysis of STRUC: CH2CN  
 -----

Number of conformers: 1

V0 = electronic energy  
 V1 = electronic energy + zero-point energy (ZPE)

ZPE is calculated using scaled frequencies  
 Frequency scale factor: 0.97300

min(V0) = -132.09059340 hartree  
 min(V1) = -132.06010267 hartree

Relative energies (in kcal/mol):

| name | V0-min(V0) | V1-min(V1) | ZPE   | mass (amu) | weight | PGS |
|------|------------|------------|-------|------------|--------|-----|
| 001  | 0.000      | 0.000      | 19.13 | 40.02      | 1      | C2v |

weight: equals 2 if the structure has a conformational enantiomer,  
 equals 1 otherwise

PGS : point group of symmetry

-----  
 Conformation: 001  
 -----

```

| Molecular formula      : C(2)H(2)N
| Number of atoms       : 5
| Number of electrons   : 21
| Vibrational DOFs     : 9
| Charge                : 0
| Multiplicity          : 2
| Electronic energy (V0): -132.09059340 hartree
| Total mass [root]    : 40.0187 amu
| Total mass           : 40.0187 amu
| Point group symmetry  : C2v
| Rotational sym num   : 2
| Cartesian coordinates (Angstrom):
|   N   +0.09818799  -0.17006658  -1.24904303  [ 14.003 amu]
|   C   +0.00844726  -0.01463109  -0.10743434  [ 12.000 amu]
|   C   -0.09933212  +0.17204827  +1.26356165  [ 12.000 amu]
|   H   +0.67055160  +0.71289283  +1.79441332  [  1.008 amu]
|   H   -0.95265910  -0.22426830  +1.79441332  [  1.008 amu]
| Moments and product of inertia (au):
|   +1.152E+04  +3.177E+05  +3.293E+05  [ 1.206E+15]
| Vibrational frequencies [1/cm] (scaled by 0.973):
|   376.43   427.65   648.58   1008.35   1022.71   1402.05
|   2177.69   3106.57   3213.85
| Vibrational zero-point energies [kcal/mol]:
|   0.54     0.61     0.93     1.44     1.46     2.00
|   3.11     4.44     4.59
| Vibrational zero-point energy:   +0.03049073 hartree =
|                                   +19.13 kcal/mol =
|                                   +0.83 eV      =
|                                   +6691.94 cm^-1
| V0 + zero-point energy (V1) : -132.06010267 hartree
|
| Partition functions (pfns):
| -----
|   T (K)  | Qtr (au) | Qtr (cm^-3) | Qrot  | Qvib [V0] | Qvib [V1] | Qel
| -----
  
```

|        |           |           |           |            |           |           |
|--------|-----------|-----------|-----------|------------|-----------|-----------|
| 10.00  | 2.229E-01 | 1.505E+24 | 1.551E+01 | 7.121E-419 | 1.000E+00 | 2.000E+00 |
| 20.00  | 6.306E-01 | 4.255E+24 | 4.387E+01 | 8.439E-210 | 1.000E+00 | 2.000E+00 |
| 30.00  | 1.158E+00 | 7.818E+24 | 8.060E+01 | 4.145E-140 | 1.000E+00 | 2.000E+00 |
| 40.00  | 1.784E+00 | 1.204E+25 | 1.241E+02 | 2.905E-105 | 1.000E+00 | 2.000E+00 |
| 50.00  | 2.493E+00 | 1.682E+25 | 1.734E+02 | 2.347E-84  | 1.000E+00 | 2.000E+00 |
| 60.00  | 3.277E+00 | 2.211E+25 | 2.280E+02 | 2.036E-70  | 1.000E+00 | 2.000E+00 |
| 70.00  | 4.129E+00 | 2.786E+25 | 2.873E+02 | 1.840E-60  | 1.001E+00 | 2.000E+00 |
| 80.00  | 5.045E+00 | 3.404E+25 | 3.510E+02 | 5.398E-53  | 1.002E+00 | 2.000E+00 |
| 90.00  | 6.020E+00 | 4.062E+25 | 4.188E+02 | 3.473E-47  | 1.004E+00 | 2.000E+00 |
| 100.00 | 7.050E+00 | 4.758E+25 | 4.905E+02 | 1.542E-42  | 1.007E+00 | 2.000E+00 |
| 110.00 | 8.134E+00 | 5.489E+25 | 5.659E+02 | 9.806E-39  | 1.011E+00 | 2.000E+00 |
| 120.00 | 9.268E+00 | 6.254E+25 | 6.448E+02 | 1.452E-35  | 1.018E+00 | 2.000E+00 |
| 130.00 | 1.045E+01 | 7.052E+25 | 7.270E+02 | 7.011E-33  | 1.026E+00 | 2.000E+00 |
| 140.00 | 1.168E+01 | 7.881E+25 | 8.125E+02 | 1.404E-30  | 1.035E+00 | 2.000E+00 |
| 150.00 | 1.295E+01 | 8.740E+25 | 9.011E+02 | 1.392E-28  | 1.047E+00 | 2.000E+00 |
| 160.00 | 1.427E+01 | 9.629E+25 | 9.927E+02 | 7.789E-27  | 1.061E+00 | 2.000E+00 |
| 170.00 | 1.563E+01 | 1.055E+26 | 1.087E+03 | 2.724E-25  | 1.077E+00 | 2.000E+00 |
| 180.00 | 1.703E+01 | 1.149E+26 | 1.185E+03 | 6.438E-24  | 1.094E+00 | 2.000E+00 |
| 190.00 | 1.846E+01 | 1.246E+26 | 1.285E+03 | 1.094E-22  | 1.114E+00 | 2.000E+00 |
| 200.00 | 1.994E+01 | 1.346E+26 | 1.387E+03 | 1.405E-21  | 1.135E+00 | 2.000E+00 |
| 210.00 | 2.145E+01 | 1.448E+26 | 1.493E+03 | 1.420E-20  | 1.159E+00 | 2.000E+00 |
| 220.00 | 2.301E+01 | 1.552E+26 | 1.601E+03 | 1.166E-19  | 1.184E+00 | 2.000E+00 |
| 230.00 | 2.459E+01 | 1.660E+26 | 1.711E+03 | 8.001E-19  | 1.212E+00 | 2.000E+00 |
| 240.00 | 2.621E+01 | 1.769E+26 | 1.824E+03 | 4.689E-18  | 1.241E+00 | 2.000E+00 |
| 250.00 | 2.787E+01 | 1.881E+26 | 1.939E+03 | 2.393E-17  | 1.273E+00 | 2.000E+00 |
| 260.00 | 2.956E+01 | 1.995E+26 | 2.056E+03 | 1.080E-16  | 1.306E+00 | 2.000E+00 |
| 270.00 | 3.128E+01 | 2.111E+26 | 2.176E+03 | 4.373E-16  | 1.342E+00 | 2.000E+00 |
| 280.00 | 3.303E+01 | 2.229E+26 | 2.298E+03 | 1.607E-15  | 1.380E+00 | 2.000E+00 |
| 300.00 | 3.663E+01 | 2.472E+26 | 2.549E+03 | 1.685E-14  | 1.462E+00 | 2.000E+00 |
| 320.00 | 4.036E+01 | 2.723E+26 | 2.808E+03 | 1.330E-13  | 1.553E+00 | 2.000E+00 |
| 340.00 | 4.420E+01 | 2.983E+26 | 3.075E+03 | 8.315E-13  | 1.653E+00 | 2.000E+00 |
| 360.00 | 4.816E+01 | 3.250E+26 | 3.350E+03 | 4.278E-12  | 1.764E+00 | 2.000E+00 |
| 400.00 | 5.640E+01 | 3.806E+26 | 3.924E+03 | 7.098E-11  | 2.018E+00 | 2.000E+00 |

-----

Qtr : translational pfn per volume unit

Qrot: rotational pfn (rigid-rotor); includes rotational symmetry number

Qvib: vibrational pfn (harmonic-oscillator) relative to V0 and to V1

Qel : electronic pfn

| T (K)  | Qtot [V0]  | Qtot [V1] | Qtot [V0]  | Qtot [V1] |
|--------|------------|-----------|------------|-----------|
| 10.00  | 4.925E-418 | 6.916E+00 | 3.324E-393 | 4.667E+25 |
| 20.00  | 4.669E-208 | 5.533E+01 | 3.151E-183 | 3.734E+26 |
| 30.00  | 7.740E-138 | 1.867E+02 | 5.223E-113 | 1.260E+27 |
| 40.00  | 1.286E-102 | 4.426E+02 | 8.677E-78  | 2.987E+27 |
| 50.00  | 2.029E-81  | 8.646E+02 | 1.369E-56  | 5.834E+27 |
| 60.00  | 3.042E-67  | 1.494E+03 | 2.053E-42  | 1.008E+28 |
| 70.00  | 4.366E-57  | 2.374E+03 | 2.946E-32  | 1.602E+28 |
| 80.00  | 1.912E-49  | 3.547E+03 | 1.290E-24  | 2.394E+28 |
| 90.00  | 1.751E-43  | 5.060E+03 | 1.182E-18  | 3.415E+28 |
| 100.00 | 1.067E-38  | 6.963E+03 | 7.198E-14  | 4.699E+28 |
| 110.00 | 9.027E-35  | 9.310E+03 | 6.091E-10  | 6.282E+28 |
| 120.00 | 1.735E-31  | 1.216E+04 | 1.171E-06  | 8.207E+28 |
| 130.00 | 1.065E-28  | 1.558E+04 | 7.189E-04  | 1.052E+29 |
| 140.00 | 2.665E-26  | 1.965E+04 | 1.799E-01  | 1.326E+29 |
| 150.00 | 3.249E-24  | 2.445E+04 | 2.192E+01  | 1.650E+29 |
| 160.00 | 2.207E-22  | 3.006E+04 | 1.489E+03  | 2.028E+29 |
| 170.00 | 9.256E-21  | 3.659E+04 | 6.246E+04  | 2.469E+29 |
| 180.00 | 2.597E-19  | 4.414E+04 | 1.752E+06  | 2.979E+29 |
| 190.00 | 5.191E-18  | 5.284E+04 | 3.503E+07  | 3.566E+29 |
| 200.00 | 7.776E-17  | 6.283E+04 | 5.248E+08  | 4.240E+29 |
| 210.00 | 9.095E-16  | 7.424E+04 | 6.138E+09  | 5.010E+29 |
| 220.00 | 8.589E-15  | 8.723E+04 | 5.796E+10  | 5.887E+29 |



## H<sub>2</sub>O information

-----  
Analysis of STRUC: H2O  
-----

Number of conformers: 1

V0 = electronic energy  
V1 = electronic energy + zero-point energy (ZPE)

ZPE is calculated using scaled frequencies  
Frequency scale factor: 0.97300

min(V0) = -76.42802340 hartree  
min(V1) = -76.40689392 hartree

Relative energies (in kcal/mol):

| name | V0-min(V0) | V1-min(V1) | ZPE   | mass (amu) | weight | PGS |
|------|------------|------------|-------|------------|--------|-----|
| 001  | 0.000      | 0.000      | 13.26 | 18.01      | 1      | C2v |

weight: equals 2 if the structure has a conformational enantiomer,  
equals 1 otherwise

PGS : point group of symmetry

-----  
Conformation: 001  
-----

| Molecular formula : H(2)O  
| Number of atoms : 3  
| Number of electrons : 10  
| Vibrational DOFs : 3  
| Charge : 0  
| Multiplicity : 1  
| Electronic energy (V0): -76.42802340 hartree  
| Total mass [root] : 18.0106 amu  
| Total mass : 18.0106 amu  
| Point group symmetry : C2v  
| Rotational sym num : 2  
| Cartesian coordinates (Angstrom):  
| O -0.05149210 +0.00000000 -0.03890814 [ 15.995 amu]  
| H -0.05149210 +0.00000000 +0.91765982 [ 1.008 amu]  
| H +0.86870891 +0.00000000 -0.30015964 [ 1.008 amu]  
| Moments and product of inertia (au):  
| +3.875E+03 +7.643E+03 +1.152E+04 [ 3.411E+11]  
| Vibrational frequencies [1/cm] (scaled by 0.973):  
| 1590.53 3793.63 3890.61  
| Vibrational zero-point energies [kcal/mol]:  
| 2.27 5.42 5.56  
| Vibrational zero-point energy: +0.02112948 hartree =  
| +13.26 kcal/mol =  
| +0.57 eV =  
| +4637.39 cm<sup>-1</sup>  
| V0 + zero-point energy (V1) : -76.40689392 hartree

| Partition functions (pfns):

| T (K) | Qtr (au)  | Qtr (cm <sup>-3</sup> ) | Qrot      | Qvib [V0]  | Qvib [V1] | Qel       |
|-------|-----------|-------------------------|-----------|------------|-----------|-----------|
| 10.00 | 6.731E-02 | 4.542E+23               | 2.609E-01 | 1.706E-290 | 1.000E+00 | 1.000E+00 |
| 20.00 | 1.904E-01 | 1.285E+24               | 7.379E-01 | 1.306E-145 | 1.000E+00 | 1.000E+00 |
| 30.00 | 3.498E-01 | 2.360E+24               | 1.356E+00 | 2.574E-97  | 1.000E+00 | 1.000E+00 |
| 40.00 | 5.385E-01 | 3.634E+24               | 2.087E+00 | 3.614E-73  | 1.000E+00 | 1.000E+00 |

|        |           |           |           |           |           |           |
|--------|-----------|-----------|-----------|-----------|-----------|-----------|
| 50.00  | 7.526E-01 | 5.079E+24 | 2.917E+00 | 1.113E-58 | 1.000E+00 | 1.000E+00 |
| 60.00  | 9.893E-01 | 6.676E+24 | 3.834E+00 | 5.074E-49 | 1.000E+00 | 1.000E+00 |
| 70.00  | 1.247E+00 | 8.413E+24 | 4.832E+00 | 4.023E-42 | 1.000E+00 | 1.000E+00 |
| 80.00  | 1.523E+00 | 1.028E+25 | 5.904E+00 | 6.012E-37 | 1.000E+00 | 1.000E+00 |
| 90.00  | 1.817E+00 | 1.226E+25 | 7.044E+00 | 6.361E-33 | 1.000E+00 | 1.000E+00 |
| 100.00 | 2.129E+00 | 1.436E+25 | 8.250E+00 | 1.055E-29 | 1.000E+00 | 1.000E+00 |
| 110.00 | 2.456E+00 | 1.657E+25 | 9.518E+00 | 4.544E-27 | 1.000E+00 | 1.000E+00 |
| 120.00 | 2.798E+00 | 1.888E+25 | 1.085E+01 | 7.123E-25 | 1.000E+00 | 1.000E+00 |
| 130.00 | 3.155E+00 | 2.129E+25 | 1.223E+01 | 5.130E-23 | 1.000E+00 | 1.000E+00 |
| 140.00 | 3.526E+00 | 2.379E+25 | 1.367E+01 | 2.006E-21 | 1.000E+00 | 1.000E+00 |
| 150.00 | 3.910E+00 | 2.639E+25 | 1.516E+01 | 4.810E-20 | 1.000E+00 | 1.000E+00 |
| 160.00 | 4.308E+00 | 2.907E+25 | 1.670E+01 | 7.753E-19 | 1.000E+00 | 1.000E+00 |
| 170.00 | 4.718E+00 | 3.184E+25 | 1.829E+01 | 9.012E-18 | 1.000E+00 | 1.000E+00 |
| 180.00 | 5.140E+00 | 3.469E+25 | 1.992E+01 | 7.976E-17 | 1.000E+00 | 1.000E+00 |
| 190.00 | 5.575E+00 | 3.762E+25 | 2.161E+01 | 5.611E-16 | 1.000E+00 | 1.000E+00 |
| 200.00 | 6.021E+00 | 4.063E+25 | 2.334E+01 | 3.248E-15 | 1.000E+00 | 1.000E+00 |
| 210.00 | 6.478E+00 | 4.371E+25 | 2.511E+01 | 1.590E-14 | 1.000E+00 | 1.000E+00 |
| 220.00 | 6.946E+00 | 4.687E+25 | 2.692E+01 | 6.741E-14 | 1.000E+00 | 1.000E+00 |
| 230.00 | 7.425E+00 | 5.011E+25 | 2.878E+01 | 2.520E-13 | 1.000E+00 | 1.000E+00 |
| 240.00 | 7.914E+00 | 5.341E+25 | 3.068E+01 | 8.440E-13 | 1.000E+00 | 1.000E+00 |
| 250.00 | 8.414E+00 | 5.678E+25 | 3.261E+01 | 2.566E-12 | 1.000E+00 | 1.000E+00 |
| 260.00 | 8.924E+00 | 6.022E+25 | 3.459E+01 | 7.164E-12 | 1.000E+00 | 1.000E+00 |
| 270.00 | 9.444E+00 | 6.373E+25 | 3.660E+01 | 1.853E-11 | 1.000E+00 | 1.000E+00 |
| 280.00 | 9.973E+00 | 6.730E+25 | 3.866E+01 | 4.480E-11 | 1.000E+00 | 1.000E+00 |
| 300.00 | 1.106E+01 | 7.464E+25 | 4.287E+01 | 2.194E-10 | 1.000E+00 | 1.000E+00 |
| 320.00 | 1.218E+01 | 8.223E+25 | 4.723E+01 | 8.812E-10 | 1.001E+00 | 1.000E+00 |
| 340.00 | 1.334E+01 | 9.006E+25 | 5.172E+01 | 3.006E-09 | 1.001E+00 | 1.000E+00 |
| 360.00 | 1.454E+01 | 9.812E+25 | 5.635E+01 | 8.946E-09 | 1.002E+00 | 1.000E+00 |
| 400.00 | 1.703E+01 | 1.149E+26 | 6.600E+01 | 5.718E-08 | 1.003E+00 | 1.000E+00 |

-----

Qtr : translational pfn per volume unit

Qrot: rotational pfn (rigid-rotor); includes rotational symmetry number

Qvib: vibrational pfn (harmonic-oscillator) relative to V0 and to V1

Qel : electronic pfn

| T (K)  | Qtot [V0]  | Qtot [V1] | Qtot [V0]  | Qtot [V1] |
|--------|------------|-----------|------------|-----------|
| 10.00  | 2.996E-292 | 1.756E-02 | 2.022E-267 | 1.185E+23 |
| 20.00  | 1.835E-146 | 1.405E-01 | 1.238E-121 | 9.481E+23 |
| 30.00  | 1.221E-97  | 4.742E-01 | 8.237E-73  | 3.200E+24 |
| 40.00  | 4.062E-73  | 1.124E+00 | 2.741E-48  | 7.585E+24 |
| 50.00  | 2.443E-58  | 2.195E+00 | 1.648E-33  | 1.481E+25 |
| 60.00  | 1.925E-48  | 3.793E+00 | 1.299E-23  | 2.560E+25 |
| 70.00  | 2.423E-41  | 6.024E+00 | 1.635E-16  | 4.065E+25 |
| 80.00  | 5.405E-36  | 8.992E+00 | 3.648E-11  | 6.068E+25 |
| 90.00  | 8.144E-32  | 1.280E+01 | 5.496E-07  | 8.640E+25 |
| 100.00 | 1.853E-28  | 1.756E+01 | 1.250E-03  | 1.185E+26 |
| 110.00 | 1.062E-25  | 2.337E+01 | 7.168E-01  | 1.577E+26 |
| 120.00 | 2.162E-23  | 3.035E+01 | 1.459E+02  | 2.048E+26 |
| 130.00 | 1.979E-21  | 3.858E+01 | 1.336E+04  | 2.604E+26 |
| 140.00 | 9.666E-20  | 4.819E+01 | 6.523E+05  | 3.252E+26 |
| 150.00 | 2.851E-18  | 5.927E+01 | 1.924E+07  | 4.000E+26 |
| 160.00 | 5.577E-17  | 7.193E+01 | 3.764E+08  | 4.854E+26 |
| 170.00 | 7.776E-16  | 8.628E+01 | 5.247E+09  | 5.823E+26 |
| 180.00 | 8.169E-15  | 1.024E+02 | 5.513E+10  | 6.912E+26 |
| 190.00 | 6.759E-14  | 1.205E+02 | 4.561E+11  | 8.129E+26 |
| 200.00 | 4.563E-13  | 1.405E+02 | 3.079E+12  | 9.481E+26 |
| 210.00 | 2.587E-12  | 1.626E+02 | 1.746E+13  | 1.098E+27 |
| 220.00 | 1.261E-11  | 1.870E+02 | 8.507E+13  | 1.262E+27 |
| 230.00 | 5.385E-11  | 2.137E+02 | 3.634E+14  | 1.442E+27 |
| 240.00 | 2.049E-10  | 2.428E+02 | 1.383E+15  | 1.638E+27 |
| 250.00 | 7.042E-10  | 2.744E+02 | 4.752E+15  | 1.852E+27 |
| 260.00 | 2.211E-09  | 3.087E+02 | 1.492E+16  | 2.083E+27 |

|        |           |           |           |           |
|--------|-----------|-----------|-----------|-----------|
| 270.00 | 6.406E-09 | 3.457E+02 | 4.323E+16 | 2.333E+27 |
| 280.00 | 1.727E-08 | 3.856E+02 | 1.165E+17 | 2.602E+27 |
| 300.00 | 1.040E-07 | 4.744E+02 | 7.021E+17 | 3.201E+27 |
| 320.00 | 5.071E-07 | 5.759E+02 | 3.422E+18 | 3.887E+27 |
| 340.00 | 2.075E-06 | 6.911E+02 | 1.400E+19 | 4.664E+27 |
| 360.00 | 7.330E-06 | 8.208E+02 | 4.947E+19 | 5.539E+27 |
| 400.00 | 6.427E-05 | 1.128E+03 | 4.337E+20 | 7.610E+27 |

-----  
|                   |                   in au                   |                   in cm<sup>-3</sup>  
-----

Qtot: total pfn per unit volume  
\* [V0] --> from the bottom of the potential (V0)  
\* [V1] --> from the zero-point energy (V1)  
\* includes rotational symmetry number

Gibbs free energy (hartree):

-----

| T (K)  | v = 1 cm <sup>3</sup> | v = kbT/p0   |
|--------|-----------------------|--------------|
| 10.00  | -76.40857642          | -76.40705535 |
| 20.00  | -76.41039063          | -76.40739238 |
| 30.00  | -76.41225456          | -76.40779570 |
| 40.00  | -76.41415076          | -76.40824206 |
| 50.00  | -76.41607097          | -76.40872043 |
| 60.00  | -76.41801031          | -76.40922430 |
| 70.00  | -76.41996556          | -76.40974939 |
| 80.00  | -76.42193442          | -76.41029263 |
| 90.00  | -76.42391520          | -76.41085175 |
| 100.00 | -76.42590655          | -76.41142497 |
| 110.00 | -76.42790741          | -76.41201088 |
| 120.00 | -76.42991693          | -76.41260832 |
| 130.00 | -76.43193437          | -76.41321633 |
| 140.00 | -76.43395913          | -76.41383410 |
| 150.00 | -76.43599068          | -76.41446092 |
| 160.00 | -76.43802856          | -76.41509619 |
| 170.00 | -76.44007239          | -76.41573938 |
| 180.00 | -76.44212181          | -76.41639003 |
| 190.00 | -76.44417652          | -76.41704773 |
| 200.00 | -76.44623622          | -76.41771209 |
| 210.00 | -76.44830068          | -76.41838279 |
| 220.00 | -76.45036967          | -76.41905953 |
| 230.00 | -76.45244299          | -76.41974203 |
| 240.00 | -76.45452044          | -76.42043005 |
| 250.00 | -76.45660187          | -76.42112336 |
| 260.00 | -76.45868710          | -76.42182175 |
| 270.00 | -76.46077600          | -76.42252502 |
| 280.00 | -76.46286844          | -76.42323301 |
| 300.00 | -76.46706346          | -76.42466247 |
| 320.00 | -76.47127127          | -76.42610895 |
| 340.00 | -76.47549112          | -76.42757143 |
| 360.00 | -76.47972236          | -76.42904903 |
| 400.00 | -76.48821676          | -76.43204652 |

-----

v : volume per molecule  
p0: 1bar

## Torsional potential and anharmonic/harmonic ratios

All internal rotations were fitted to Fourier series of the type:

$$V(x) = V_0 \sum_i^{n_{max}} a_i \cos(ix) \quad (\text{ES.4})$$

Table S1: Parameters for the C...OH rotation in TS1a.  $V_0 = +237.09361$ , Reduced moment of inertia =  $0.785 \text{ amu } \text{Å}^2$

| $i$ | $a_i$      |
|-----|------------|
| 1   | -198.77693 |
| 2   | -29.77956  |
| 3   | -5.32847   |
| 4   | -1.84741   |
| 5   | -1.18707   |
| 6   | -0.35570   |

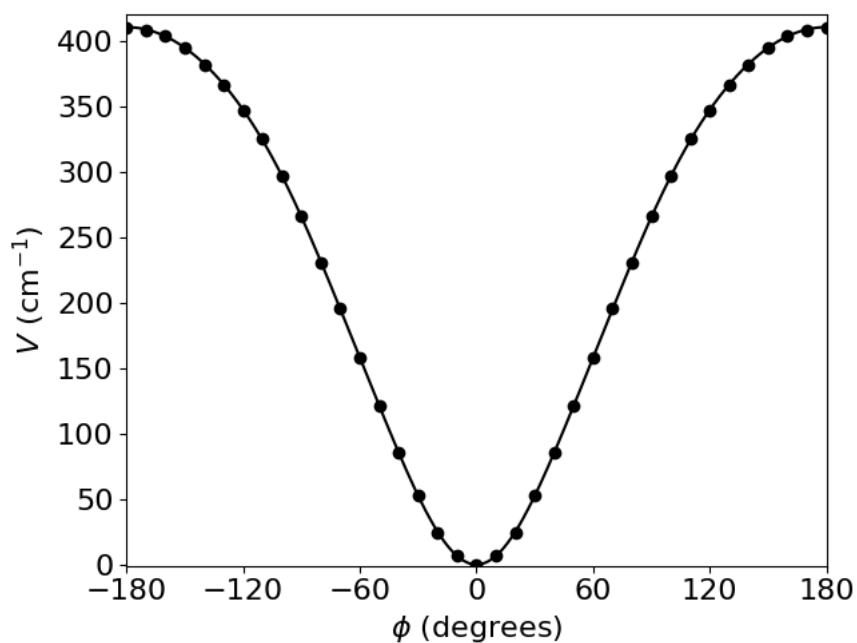

Figure S4: Fitted (solid curve) versus calculated (dots) torsional potential.

Table S2: Parameters for the C...OH rotation in TS1b.  $V_0 = +1601.78885$ , Reduced moment of inertia =  $0.785 \text{ amu \AA}^2$

| $i$ | $a_i$       |
|-----|-------------|
| 1   | -1755.78852 |
| 2   | +181.52297  |
| 3   | -32.62399   |
| 4   | +18.89707   |
| 5   | -14.68224   |
| 6   | -5.57603    |

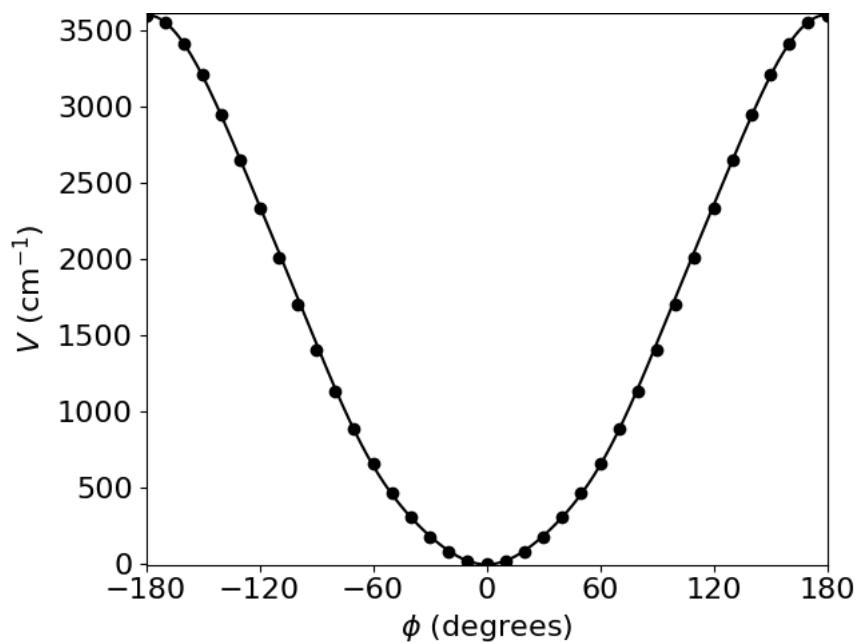

Figure S5: Fitted (solid curve) versus calculated (dots) torsional potential.



Table S3: Parameters for the CH<sub>3</sub> rotation in TS1b.  $V_0 = +167.0566$ , Reduced moment of inertia = 3.019 amu Å<sup>2</sup>

| $i$ | $a_i$      |
|-----|------------|
| 3   | -190.08196 |
| 6   | +26.85520  |

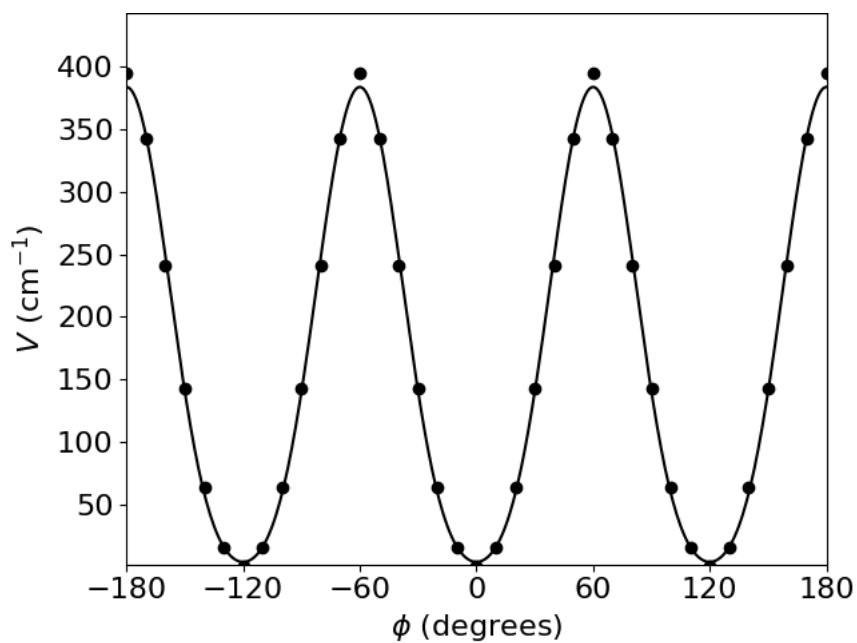

Figure S6: Fitted (solid curve) versus calculated (dots) torsional potential.

Table S4: Ratios between the anharmonic and harmonic 1D partition functions for TS1a (OH internal rotation) and TS1b (OH and CH<sub>3</sub> internal rotations), respectively.

| T(K) | TS1a  | TS1b  |
|------|-------|-------|
| 10   | 4.735 | 3.347 |
| 20   | 2.177 | 1.830 |
| 30   | 1.686 | 1.504 |
| 40   | 1.496 | 1.376 |
| 50   | 1.404 | 1.316 |
| 60   | 1.357 | 1.285 |
| 70   | 1.332 | 1.269 |
| 80   | 1.322 | 1.260 |
| 90   | 1.320 | 1.256 |
| 100  | 1.325 | 1.254 |
| 110  | 1.333 | 1.254 |
| 120  | 1.344 | 1.255 |
| 130  | 1.358 | 1.257 |
| 140  | 1.372 | 1.258 |
| 150  | 1.387 | 1.260 |
| 160  | 1.403 | 1.262 |
| 170  | 1.419 | 1.263 |
| 180  | 1.434 | 1.265 |
| 190  | 1.449 | 1.266 |
| 200  | 1.464 | 1.267 |
| 210  | 1.478 | 1.268 |
| 220  | 1.492 | 1.268 |
| 230  | 1.505 | 1.268 |
| 240  | 1.517 | 1.268 |
| 250  | 1.528 | 1.268 |
| 260  | 1.539 | 1.267 |
| 270  | 1.549 | 1.267 |
| 280  | 1.559 | 1.266 |
| 300  | 1.576 | 1.263 |
| 320  | 1.590 | 1.260 |
| 340  | 1.602 | 1.256 |
| 360  | 1.612 | 1.251 |
| 400  | 1.627 | 1.241 |

# Thermal rate coefficients and branching ratios

Table S5: Variational,  $\Gamma^{\text{CVT}}$ , tunneling effects,  $\kappa_{\text{LPL}}^{\text{CVT/SCT}}$ ,  $\kappa_{\text{HPL}}^{\text{CVT/SCT}}$ , harmonic-oscillator,  $k^{\text{TST,HO}}$ , and anharmonic,  $k^{\text{TST,Anh}}$ , TST rate constants, and CVT/SCT rate coefficients in the low-pressure,  $k_{\text{LPL}}^{\text{CVT/SCT}}$ , and high-pressure,  $k_{\text{HPL}}^{\text{CVT/SCT}}$ , regimes, for the hydrogen abstraction from the methyl group. Rate coefficients in  $\text{cm}^3\text{molecule}^{-1}\text{s}^{-1}$ .

| T(K) | $\Gamma^{\text{CVT}}$ | $\kappa_{\text{LPL}}^{\text{CVT/SCT}}$ | $\kappa_{\text{HPL}}^{\text{CVT/SCT}}$ | $k^{\text{TST,HO}}$ | $k^{\text{TST,Anh}}$ | $k_{\text{LPL}}^{\text{CVT/SCT}}$ | $k_{\text{HPL}}^{\text{CVT/SCT}}$ |
|------|-----------------------|----------------------------------------|----------------------------------------|---------------------|----------------------|-----------------------------------|-----------------------------------|
| 10   | 1.844e-25*            | 5.369e+86                              | 5.568e+107                             | 2.311e-100          | 1.094e-99            | 1.083e-37                         | 1.123e-16                         |
| 20   | 4.364e-13             | 2.515e+40                              | 1.071e+49                              | 4.188e-56           | 9.116e-56            | 1.000e-27                         | 4.261e-19                         |
| 30   | 5.905e-09             | 9.805e+24                              | 3.319e+29                              | 1.856e-41           | 3.129e-41            | 1.812e-24                         | 6.132e-20                         |
| 40   | 6.943e-07             | 2.131e+17                              | 7.421e+19                              | 3.529e-34           | 5.278e-34            | 7.808e-23                         | 2.719e-20                         |
| 50   | 1.219e-05             | 5.895e+12                              | 1.674e+14                              | 7.822e-30           | 1.098e-29            | 7.891e-22                         | 2.241e-20                         |
| 60   | 8.262e-05             | 5.884e+09                              | 3.989e+10                              | 6.001e-27           | 8.141e-27            | 3.956e-21                         | 2.682e-20                         |
| 70   | 3.246e-04             | 4.604e+07                              | 1.435e+08                              | 6.788e-25           | 9.045e-25            | 1.351e-20                         | 4.211e-20                         |
| 80   | 9.070e-04             | 1.317e+06                              | 2.610e+06                              | 2.332e-23           | 3.083e-23            | 3.680e-20                         | 7.294e-20                         |
| 90   | 2.019e-03             | 8.782e+04                              | 1.365e+05                              | 3.634e-22           | 4.798e-22            | 8.502e-20                         | 1.321e-19                         |
| 100  | 3.831e-03             | 1.129e+04                              | 1.476e+04                              | 3.261e-21           | 4.320e-21            | 1.867e-19                         | 2.440e-19                         |
| 110  | 6.475e-03             | 2.279e+03                              | 2.682e+03                              | 1.963e-20           | 2.617e-20            | 3.858e-19                         | 4.540e-19                         |
| 120  | 1.003e-02             | 6.472e+02                              | 7.141e+02                              | 8.768e-20           | 1.179e-19            | 7.642e-19                         | 8.432e-19                         |
| 130  | 1.453e-02             | 2.385e+02                              | 2.532e+02                              | 3.116e-19           | 4.230e-19            | 1.464e-18                         | 1.554e-18                         |
| 140  | 1.998e-02             | 1.075e+02                              | 1.114e+02                              | 9.256e-19           | 1.270e-18            | 2.724e-18                         | 2.822e-18                         |
| 150  | 2.632e-02             | 5.653e+01                              | 5.782e+01                              | 2.384e-18           | 3.307e-18            | 4.912e-18                         | 5.024e-18                         |
| 160  | 3.352e-02             | 3.355e+01                              | 3.402e+01                              | 5.469e-18           | 7.672e-18            | 8.612e-18                         | 8.732e-18                         |
| 170  | 4.149e-02             | 2.186e+01                              | 2.206e+01                              | 1.141e-17           | 1.619e-17            | 1.465e-17                         | 1.478e-17                         |
| 180  | 5.016e-02             | 1.533e+01                              | 1.542e+01                              | 2.199e-17           | 3.153e-17            | 2.419e-17                         | 2.433e-17                         |
| 190  | 5.944e-02             | 1.139e+01                              | 1.144e+01                              | 3.968e-17           | 5.750e-17            | 3.883e-17                         | 3.900e-17                         |
| 200  | 6.925e-02             | 8.865e+00                              | 8.889e+00                              | 6.766e-17           | 9.905e-17            | 6.063e-17                         | 6.079e-17                         |
| 210  | 7.950e-02             | 7.160e+00                              | 7.174e+00                              | 1.100e-16           | 1.626e-16            | 9.218e-17                         | 9.236e-17                         |
| 220  | 9.013e-02             | 5.961e+00                              | 5.969e+00                              | 1.714e-16           | 2.557e-16            | 1.367e-16                         | 1.369e-16                         |
| 230  | 1.010e-01             | 5.086e+00                              | 5.091e+00                              | 2.578e-16           | 3.879e-16            | 1.981e-16                         | 1.983e-16                         |
| 240  | 1.122e-01             | 4.430e+00                              | 4.433e+00                              | 3.757e-16           | 5.698e-16            | 2.814e-16                         | 2.816e-16                         |
| 250  | 1.235e-01             | 3.925e+00                              | 3.927e+00                              | 5.326e-16           | 8.140e-16            | 3.918e-16                         | 3.920e-16                         |
| 260  | 1.349e-01             | 3.527e+00                              | 3.529e+00                              | 7.368e-16           | 1.134e-15            | 5.354e-16                         | 5.358e-16                         |
| 270  | 1.464e-01             | 3.209e+00                              | 3.210e+00                              | 9.974e-16           | 1.545e-15            | 7.200e-16                         | 7.203e-16                         |
| 280  | 1.579e-01             | 2.950e+00                              | 2.950e+00                              | 1.324e-15           | 2.064e-15            | 9.530e-16                         | 9.530e-16                         |
| 300  | 1.807e-01             | 2.556e+00                              | 2.557e+00                              | 2.220e-15           | 3.498e-15            | 1.600e-15                         | 1.601e-15                         |
| 320  | 2.031e-01             | 2.276e+00                              | 2.276e+00                              | 3.517e-15           | 5.592e-15            | 2.559e-15                         | 2.559e-15                         |
| 340  | 2.250e-01             | 2.068e+00                              | 2.068e+00                              | 5.318e-15           | 8.520e-15            | 3.921e-15                         | 3.921e-15                         |
| 360  | 2.460e-01             | 1.909e+00                              | 1.909e+00                              | 7.735e-15           | 1.247e-14            | 5.789e-15                         | 5.789e-15                         |
| 400  | 2.854e-01             | 1.686e+00                              | 1.686e+00                              | 1.490e-14           | 2.424e-14            | 1.152e-14                         | 1.152e-14                         |

\* 1.844e-25 means  $1.844 \times 10^{-25}$

Table S6: Same as Table S5 but for the OH addition, being TS1b the transition state.

| T(K) | $\Gamma^{\text{CVT}}$ | $\kappa_{\text{LPL}}^{\text{CVT/SCT}}$ | $\kappa_{\text{HPL}}^{\text{CVT/SCT}}$ | $k^{\text{TST,HO}}$ | $k^{\text{TST,Anh}}$ | $k_{\text{LPL}}^{\text{CVT/SCT}}$ | $k_{\text{HPL}}^{\text{CVT/SCT}}$ |
|------|-----------------------|----------------------------------------|----------------------------------------|---------------------|----------------------|-----------------------------------|-----------------------------------|
| 10   | 2.291e-01             | 7.587e+59                              | 1.060e+133                             | 3.443e-74           | 1.152e-73            | 2.003e-14                         | 2.799e+59                         |
| 20   | 4.773e-01             | 6.703e+27                              | 3.107e+58                              | 4.206e-43           | 7.699e-43            | 2.463e-15                         | 1.142e+16                         |
| 30   | 6.095e-01             | 1.424e+17                              | 4.999e+33                              | 7.455e-33           | 1.121e-32            | 9.733e-16                         | 3.417e+01                         |
| 40   | 6.883e-01             | 6.909e+11                              | 2.460e+21                              | 8.742e-28           | 1.203e-27            | 5.721e-16                         | 2.037e-06                         |
| 50   | 7.395e-01             | 4.720e+08                              | 1.674e+14                              | 8.930e-25           | 1.175e-24            | 4.102e-16                         | 1.455e-10                         |
| 60   | 7.745e-01             | 3.863e+06                              | 7.077e+09                              | 8.648e-23           | 1.111e-22            | 3.325e-16                         | 6.092e-13                         |
| 70   | 7.989e-01             | 1.319e+05                              | 1.190e+07                              | 2.201e-21           | 2.793e-21            | 2.943e-16                         | 2.655e-14                         |
| 80   | 8.163e-01             | 1.110e+04                              | 1.600e+05                              | 2.448e-20           | 3.085e-20            | 2.796e-16                         | 4.030e-15                         |
| 90   | 8.290e-01             | 1.721e+03                              | 8.002e+03                              | 1.575e-19           | 1.978e-19            | 2.822e-16                         | 1.312e-15                         |
| 100  | 8.379e-01             | 4.132e+02                              | 9.644e+02                              | 6.937e-19           | 8.702e-19            | 3.013e-16                         | 7.032e-16                         |
| 110  | 8.441e-01             | 1.371e+02                              | 2.131e+02                              | 2.324e-18           | 2.915e-18            | 3.374e-16                         | 5.244e-16                         |
| 120  | 8.485e-01             | 5.812e+01                              | 7.179e+01                              | 6.355e-18           | 7.977e-18            | 3.934e-16                         | 4.859e-16                         |
| 130  | 8.515e-01             | 2.926e+01                              | 3.242e+01                              | 1.488e-17           | 1.870e-17            | 4.658e-16                         | 5.162e-16                         |
| 140  | 8.534e-01             | 1.733e+01                              | 1.794e+01                              | 3.086e-17           | 3.883e-17            | 5.742e-16                         | 5.944e-16                         |
| 150  | 8.542e-01             | 1.143e+01                              | 1.144e+01                              | 5.816e-17           | 7.328e-17            | 7.155e-16                         | 7.161e-16                         |
| 160  | 8.547e-01             | 8.070e+00                              | 8.070e+00                              | 1.014e-16           | 1.279e-16            | 8.824e-16                         | 8.824e-16                         |
| 170  | 8.545e-01             | 6.120e+00                              | 6.120e+00                              | 1.659e-16           | 2.096e-16            | 1.096e-15                         | 1.096e-15                         |
| 180  | 8.540e-01             | 4.896e+00                              | 4.896e+00                              | 2.574e-16           | 3.255e-16            | 1.361e-15                         | 1.361e-15                         |
| 190  | 8.534e-01             | 4.079e+00                              | 4.079e+00                              | 3.822e-16           | 4.838e-16            | 1.684e-15                         | 1.684e-15                         |
| 200  | 8.523e-01             | 3.504e+00                              | 3.504e+00                              | 5.466e-16           | 6.925e-16            | 2.068e-15                         | 2.068e-15                         |
| 210  | 8.512e-01             | 3.084e+00                              | 3.084e+00                              | 7.571e-16           | 9.597e-16            | 2.519e-15                         | 2.519e-15                         |
| 220  | 8.500e-01             | 2.767e+00                              | 2.767e+00                              | 1.020e-15           | 1.293e-15            | 3.042e-15                         | 3.042e-15                         |
| 230  | 8.486e-01             | 2.521e+00                              | 2.521e+00                              | 1.342e-15           | 1.702e-15            | 3.641e-15                         | 3.641e-15                         |
| 240  | 8.473e-01             | 2.325e+00                              | 2.325e+00                              | 1.729e-15           | 2.193e-15            | 4.320e-15                         | 4.320e-15                         |
| 250  | 8.457e-01             | 2.168e+00                              | 2.168e+00                              | 2.187e-15           | 2.773e-15            | 5.084e-15                         | 5.084e-15                         |
| 260  | 8.443e-01             | 2.038e+00                              | 2.038e+00                              | 2.722e-15           | 3.450e-15            | 5.936e-15                         | 5.936e-15                         |
| 270  | 8.428e-01             | 1.930e+00                              | 1.930e+00                              | 3.340e-15           | 4.231e-15            | 6.882e-15                         | 6.882e-15                         |
| 280  | 8.413e-01             | 1.839e+00                              | 1.839e+00                              | 4.046e-15           | 5.121e-15            | 7.923e-15                         | 7.923e-15                         |
| 300  | 8.383e-01             | 1.695e+00                              | 1.695e+00                              | 5.741e-15           | 7.251e-15            | 1.030e-14                         | 1.030e-14                         |
| 320  | 8.349e-01             | 1.587e+00                              | 1.587e+00                              | 7.846e-15           | 9.883e-15            | 1.310e-14                         | 1.310e-14                         |
| 340  | 8.315e-01             | 1.503e+00                              | 1.503e+00                              | 1.040e-14           | 1.306e-14            | 1.632e-14                         | 1.632e-14                         |
| 360  | 8.281e-01             | 1.436e+00                              | 1.436e+00                              | 1.342e-14           | 1.679e-14            | 1.997e-14                         | 1.997e-14                         |
| 400  | 8.217e-01             | 1.339e+00                              | 1.339e+00                              | 2.103e-14           | 2.609e-14            | 2.871e-14                         | 2.871e-14                         |

Table S7: Rate coefficients (in  $\text{cm}^3\text{molecule}^{-1}\text{s}^{-1}$ ) of association,  $k_a$ , CVT/SCT,  $k_i^{\text{CVT/SCT}}$ , and CCUS,  $k_i^{\text{CCUS}}$ , for R1a ( $i = 1a$ ) and R1b ( $i = 1b$ ) in the low-pressure limit. The global rate coefficient  $k^{\text{CCUS}}$  is also given.

| T(K) | $k_a$     | $k_{1a}^{\text{CVT/SCT}}$ | $k_{1a}^{\text{CCUS}}$ | $k_{1b}^{\text{CVT/SCT}}$ | $k_{1b}^{\text{CCUS}}$ | $k^{\text{CCUS}}$ |
|------|-----------|---------------------------|------------------------|---------------------------|------------------------|-------------------|
| 10   | 1.275e-09 | 1.083e-37                 | 1.083e-37              | 2.003e-14                 | 2.003e-14              | 2.003e-14         |
| 20   | 1.135e-09 | 1.000e-27                 | 1.000e-27              | 2.463e-15                 | 2.463e-15              | 2.463e-15         |
| 30   | 1.061e-09 | 1.812e-24                 | 1.812e-24              | 9.733e-16                 | 9.733e-16              | 9.733e-16         |
| 40   | 1.012e-09 | 7.808e-23                 | 7.808e-23              | 5.721e-16                 | 5.721e-16              | 5.721e-16         |
| 50   | 9.747e-10 | 7.891e-22                 | 7.891e-22              | 4.102e-16                 | 4.102e-16              | 4.102e-16         |
| 60   | 9.455e-10 | 3.956e-21                 | 3.956e-21              | 3.325e-16                 | 3.325e-16              | 3.325e-16         |
| 70   | 9.215e-10 | 1.351e-20                 | 1.351e-20              | 2.943e-16                 | 2.943e-16              | 2.943e-16         |
| 80   | 9.012e-10 | 3.680e-20                 | 3.680e-20              | 2.796e-16                 | 2.796e-16              | 2.796e-16         |
| 90   | 8.837e-10 | 8.502e-20                 | 8.502e-20              | 2.822e-16                 | 2.822e-16              | 2.823e-16         |
| 100  | 8.683e-10 | 1.867e-19                 | 1.867e-19              | 3.013e-16                 | 3.013e-16              | 3.015e-16         |
| 110  | 8.547e-10 | 3.858e-19                 | 3.858e-19              | 3.374e-16                 | 3.374e-16              | 3.378e-16         |
| 120  | 8.423e-10 | 7.642e-19                 | 7.642e-19              | 3.934e-16                 | 3.934e-16              | 3.941e-16         |
| 130  | 8.312e-10 | 1.464e-18                 | 1.464e-18              | 4.658e-16                 | 4.658e-16              | 4.673e-16         |
| 140  | 8.210e-10 | 2.724e-18                 | 2.724e-18              | 5.742e-16                 | 5.742e-16              | 5.769e-16         |
| 150  | 8.116e-10 | 4.912e-18                 | 4.912e-18              | 7.155e-16                 | 7.155e-16              | 7.204e-16         |
| 160  | 8.029e-10 | 8.612e-18                 | 8.612e-18              | 8.824e-16                 | 8.824e-16              | 8.910e-16         |
| 170  | 7.948e-10 | 1.465e-17                 | 1.465e-17              | 1.096e-15                 | 1.096e-15              | 1.111e-15         |
| 180  | 7.873e-10 | 2.419e-17                 | 2.419e-17              | 1.361e-15                 | 1.361e-15              | 1.385e-15         |
| 190  | 7.802e-10 | 3.883e-17                 | 3.883e-17              | 1.684e-15                 | 1.684e-15              | 1.723e-15         |
| 200  | 7.736e-10 | 6.063e-17                 | 6.063e-17              | 2.068e-15                 | 2.068e-15              | 2.129e-15         |
| 210  | 7.673e-10 | 9.218e-17                 | 9.218e-17              | 2.519e-15                 | 2.519e-15              | 2.611e-15         |
| 220  | 7.614e-10 | 1.367e-16                 | 1.367e-16              | 3.042e-15                 | 3.042e-15              | 3.179e-15         |
| 230  | 7.558e-10 | 1.981e-16                 | 1.981e-16              | 3.641e-15                 | 3.641e-15              | 3.839e-15         |
| 240  | 7.504e-10 | 2.814e-16                 | 2.814e-16              | 4.320e-15                 | 4.320e-15              | 4.601e-15         |
| 250  | 7.454e-10 | 3.918e-16                 | 3.918e-16              | 5.084e-15                 | 5.084e-15              | 5.476e-15         |
| 260  | 7.405e-10 | 5.354e-16                 | 5.354e-16              | 5.936e-15                 | 5.936e-15              | 6.471e-15         |
| 270  | 7.359e-10 | 7.200e-16                 | 7.200e-16              | 6.882e-15                 | 6.882e-15              | 7.602e-15         |
| 280  | 7.314e-10 | 9.530e-16                 | 9.530e-16              | 7.923e-15                 | 7.923e-15              | 8.875e-15         |
| 300  | 7.231e-10 | 1.600e-15                 | 1.600e-15              | 1.030e-14                 | 1.030e-14              | 1.190e-14         |
| 320  | 7.153e-10 | 2.559e-15                 | 2.559e-15              | 1.310e-14                 | 1.309e-14              | 1.565e-14         |
| 340  | 7.081e-10 | 3.921e-15                 | 3.921e-15              | 1.632e-14                 | 1.632e-14              | 2.024e-14         |
| 360  | 7.014e-10 | 5.789e-15                 | 5.789e-15              | 1.997e-14                 | 1.997e-14              | 2.575e-14         |
| 400  | 6.892e-10 | 1.152e-14                 | 1.152e-14              | 2.871e-14                 | 2.871e-14              | 4.022e-14         |

Table S8: Same as Table S7 but for the high-pressure limit.

| T(K) | $k_a$     | $k_{1a}^{\text{CVT/SCT}}$ | $k_{1a}^{\text{CCUS}}$ | $k_{1b}^{\text{CVT/SCT}}$ | $k_{1b}^{\text{CCUS}}$ | $k^{\text{CCUS}}$ |
|------|-----------|---------------------------|------------------------|---------------------------|------------------------|-------------------|
| 10   | 1.275e-09 | 1.123e-16                 | 1.123e-16              | 2.799e+59                 | 1.275e-09              | 1.275e-09         |
| 20   | 1.135e-09 | 4.261e-19                 | 4.261e-19              | 1.142e+16                 | 1.135e-09              | 1.135e-09         |
| 30   | 1.061e-09 | 6.132e-20                 | 6.132e-20              | 3.417e+01                 | 1.061e-09              | 1.061e-09         |
| 40   | 1.012e-09 | 2.719e-20                 | 2.719e-20              | 2.037e-06                 | 1.011e-09              | 1.011e-09         |
| 50   | 9.747e-10 | 2.241e-20                 | 2.241e-20              | 1.455e-10                 | 1.266e-10              | 1.266e-10         |
| 60   | 9.455e-10 | 2.682e-20                 | 2.682e-20              | 6.092e-13                 | 6.088e-13              | 6.088e-13         |
| 70   | 9.215e-10 | 4.211e-20                 | 4.211e-20              | 2.655e-14                 | 2.655e-14              | 2.655e-14         |
| 80   | 9.012e-10 | 7.294e-20                 | 7.294e-20              | 4.030e-15                 | 4.030e-15              | 4.030e-15         |
| 90   | 8.837e-10 | 1.321e-19                 | 1.321e-19              | 1.312e-15                 | 1.312e-15              | 1.312e-15         |
| 100  | 8.683e-10 | 2.440e-19                 | 2.440e-19              | 7.032e-16                 | 7.032e-16              | 7.034e-16         |
| 110  | 8.547e-10 | 4.540e-19                 | 4.540e-19              | 5.244e-16                 | 5.244e-16              | 5.248e-16         |
| 120  | 8.423e-10 | 8.432e-19                 | 8.432e-19              | 4.859e-16                 | 4.859e-16              | 4.867e-16         |
| 130  | 8.312e-10 | 1.554e-18                 | 1.554e-18              | 5.162e-16                 | 5.162e-16              | 5.177e-16         |
| 140  | 8.210e-10 | 2.822e-18                 | 2.822e-18              | 5.944e-16                 | 5.944e-16              | 5.972e-16         |
| 150  | 8.116e-10 | 5.024e-18                 | 5.024e-18              | 7.161e-16                 | 7.161e-16              | 7.211e-16         |
| 160  | 8.029e-10 | 8.732e-18                 | 8.732e-18              | 8.824e-16                 | 8.824e-16              | 8.911e-16         |
| 170  | 7.948e-10 | 1.478e-17                 | 1.478e-17              | 1.096e-15                 | 1.096e-15              | 1.111e-15         |
| 180  | 7.873e-10 | 2.433e-17                 | 2.433e-17              | 1.361e-15                 | 1.361e-15              | 1.385e-15         |
| 190  | 7.802e-10 | 3.900e-17                 | 3.900e-17              | 1.684e-15                 | 1.684e-15              | 1.723e-15         |
| 200  | 7.736e-10 | 6.079e-17                 | 6.079e-17              | 2.068e-15                 | 2.068e-15              | 2.129e-15         |
| 210  | 7.673e-10 | 9.236e-17                 | 9.236e-17              | 2.519e-15                 | 2.519e-15              | 2.612e-15         |
| 220  | 7.614e-10 | 1.369e-16                 | 1.369e-16              | 3.042e-15                 | 3.042e-15              | 3.179e-15         |
| 230  | 7.558e-10 | 1.983e-16                 | 1.983e-16              | 3.641e-15                 | 3.641e-15              | 3.840e-15         |
| 240  | 7.504e-10 | 2.816e-16                 | 2.816e-16              | 4.320e-15                 | 4.320e-15              | 4.601e-15         |
| 250  | 7.454e-10 | 3.920e-16                 | 3.920e-16              | 5.084e-15                 | 5.084e-15              | 5.476e-15         |
| 260  | 7.405e-10 | 5.358e-16                 | 5.358e-16              | 5.936e-15                 | 5.936e-15              | 6.472e-15         |
| 270  | 7.359e-10 | 7.203e-16                 | 7.203e-16              | 6.882e-15                 | 6.882e-15              | 7.602e-15         |
| 280  | 7.314e-10 | 9.530e-16                 | 9.530e-16              | 7.923e-15                 | 7.923e-15              | 8.875e-15         |
| 300  | 7.231e-10 | 1.601e-15                 | 1.601e-15              | 1.030e-14                 | 1.030e-14              | 1.190e-14         |
| 320  | 7.153e-10 | 2.559e-15                 | 2.559e-15              | 1.310e-14                 | 1.309e-14              | 1.565e-14         |
| 340  | 7.081e-10 | 3.921e-15                 | 3.921e-15              | 1.632e-14                 | 1.632e-14              | 2.024e-14         |
| 360  | 7.014e-10 | 5.789e-15                 | 5.789e-15              | 1.997e-14                 | 1.997e-14              | 2.575e-14         |
| 400  | 6.892e-10 | 1.152e-14                 | 1.152e-14              | 2.871e-14                 | 2.871e-14              | 4.022e-14         |

Table S9: Branching ratios in percentage in the low-pressure (LP) and high-pressure (HP) limits.

| T(K) | $\left(\frac{k_{1a}^{\text{CCUS}}}{k^{\text{CCUS}}}\right)_{\text{LPL}}$ | $\left(\frac{k_{1b}^{\text{CCUS}}}{k^{\text{CCUS}}}\right)_{\text{LPL}}$ | $\left(\frac{k_{1a}^{\text{CCUS}}}{k^{\text{CCUS}}}\right)_{\text{HPL}}$ | $\left(\frac{k_{1b}^{\text{CCUS}}}{k^{\text{CCUS}}}\right)_{\text{HPL}}$ |
|------|--------------------------------------------------------------------------|--------------------------------------------------------------------------|--------------------------------------------------------------------------|--------------------------------------------------------------------------|
| 10   | 0                                                                        | 100                                                                      | 0                                                                        | 100                                                                      |
| 20   | 0                                                                        | 100                                                                      | 0                                                                        | 100                                                                      |
| 30   | 0                                                                        | 100                                                                      | 0                                                                        | 100                                                                      |
| 40   | 0                                                                        | 100                                                                      | 0                                                                        | 100                                                                      |
| 50   | 0                                                                        | 100                                                                      | 0                                                                        | 100                                                                      |
| 60   | 0                                                                        | 100                                                                      | 0                                                                        | 100                                                                      |
| 70   | 0                                                                        | 100                                                                      | 0                                                                        | 100                                                                      |
| 80   | 0                                                                        | 100                                                                      | 0                                                                        | 100                                                                      |
| 90   | 0                                                                        | 100                                                                      | 0                                                                        | 100                                                                      |
| 100  | 0                                                                        | 100                                                                      | 0                                                                        | 100                                                                      |
| 110  | 0                                                                        | 100                                                                      | 0                                                                        | 100                                                                      |
| 120  | 0                                                                        | 100                                                                      | 0                                                                        | 100                                                                      |
| 130  | 0                                                                        | 100                                                                      | 0                                                                        | 100                                                                      |
| 140  | 0                                                                        | 100                                                                      | 0                                                                        | 100                                                                      |
| 150  | 1                                                                        | 99                                                                       | 1                                                                        | 99                                                                       |
| 160  | 1                                                                        | 99                                                                       | 1                                                                        | 99                                                                       |
| 170  | 1                                                                        | 99                                                                       | 1                                                                        | 99                                                                       |
| 180  | 2                                                                        | 98                                                                       | 2                                                                        | 98                                                                       |
| 190  | 2                                                                        | 98                                                                       | 2                                                                        | 98                                                                       |
| 200  | 3                                                                        | 97                                                                       | 3                                                                        | 97                                                                       |
| 210  | 4                                                                        | 96                                                                       | 4                                                                        | 96                                                                       |
| 220  | 4                                                                        | 96                                                                       | 4                                                                        | 96                                                                       |
| 230  | 5                                                                        | 95                                                                       | 5                                                                        | 95                                                                       |
| 240  | 6                                                                        | 94                                                                       | 6                                                                        | 94                                                                       |
| 250  | 7                                                                        | 93                                                                       | 7                                                                        | 93                                                                       |
| 260  | 8                                                                        | 92                                                                       | 8                                                                        | 92                                                                       |
| 270  | 9                                                                        | 91                                                                       | 9                                                                        | 91                                                                       |
| 280  | 11                                                                       | 89                                                                       | 11                                                                       | 89                                                                       |
| 300  | 13                                                                       | 87                                                                       | 13                                                                       | 87                                                                       |
| 320  | 16                                                                       | 84                                                                       | 16                                                                       | 84                                                                       |
| 340  | 19                                                                       | 81                                                                       | 19                                                                       | 81                                                                       |
| 360  | 22                                                                       | 78                                                                       | 22                                                                       | 78                                                                       |
| 400  | 29                                                                       | 71                                                                       | 29                                                                       | 71                                                                       |
